# Supplementary material for: The Formation of Inherently Chiral Calix[4]quinolines by Doebner–Miller Reaction of Aldehydes and Aminocalixarenes
Source: Molecules. 2022 Dec 4;27(23):8545. doi: 10.3390/molecules27238545 (PMC9736694; doi:10.3390/molecules27238545)
Supplement: Supplementary file 1 [file molecules-27-08545-s001.zip › molecules-2035672-supplementary.pdf]

# Supporting Information

## The Formation of Inherently Chiral Calix[4]quinolines by Doebner–Miller reaction of Aldehydes and Aminocalixarenes

Martin Tlustý,<sup>†</sup> Václav Eigner<sup>§</sup>, Hana Dvořáková<sup>‡</sup> and Pavel Lhoták<sup>†\*</sup>

<sup>†</sup>Department of Organic Chemistry, University of Chemistry and Technology, Prague (UCTP),  
Technická 5, 166 28 Prague 6, Czech Republic

<sup>§</sup>Department of Solid State Chemistry, UCTP, Technická 5, 166 28 Prague 6, Czech Republic

<sup>‡</sup>Laboratory of NMR spectroscopy, UCTP, Technická 5, 166 28 Prague 6, Czech Republic

### Table of Contents

|                                                |    |
|------------------------------------------------|----|
| 1. Spectral characterization of compounds..... | 2  |
| 2. Crystallographic data.....                  | 19 |
| 3. Chiral separation .....                     | 21 |
| 4. Titration experiments .....                 | 22 |
| 5. VT <sup>1</sup> H NMR experiments .....     | 29 |

# 1. Spectral characterization of compounds

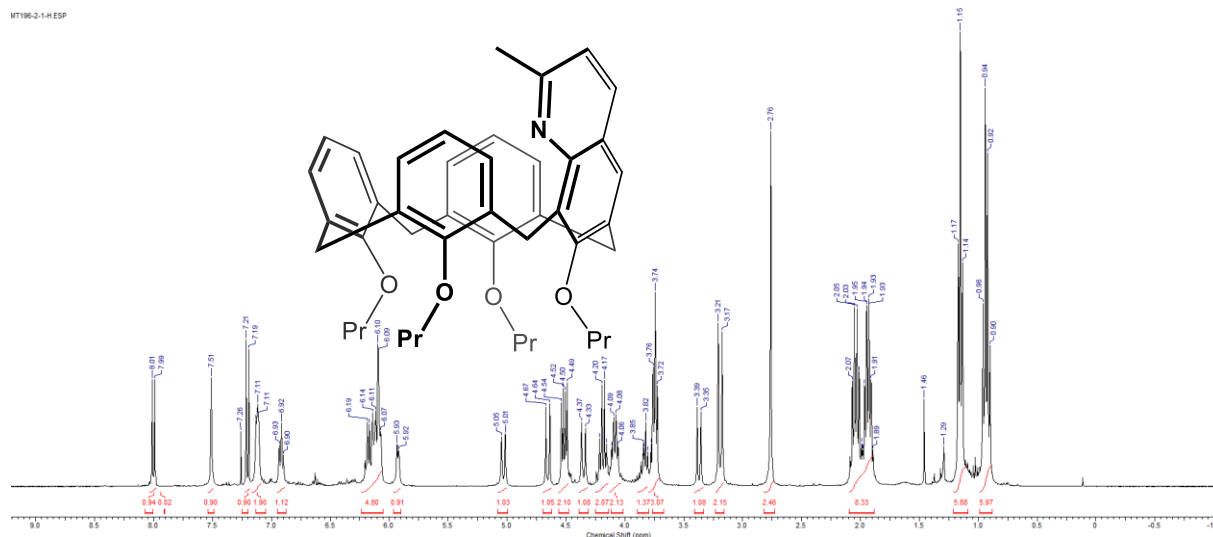

**Figure S1:**  $^1\text{H}$  NMR of compound 4a ( $\text{CDCl}_3$ , 400 MHz).

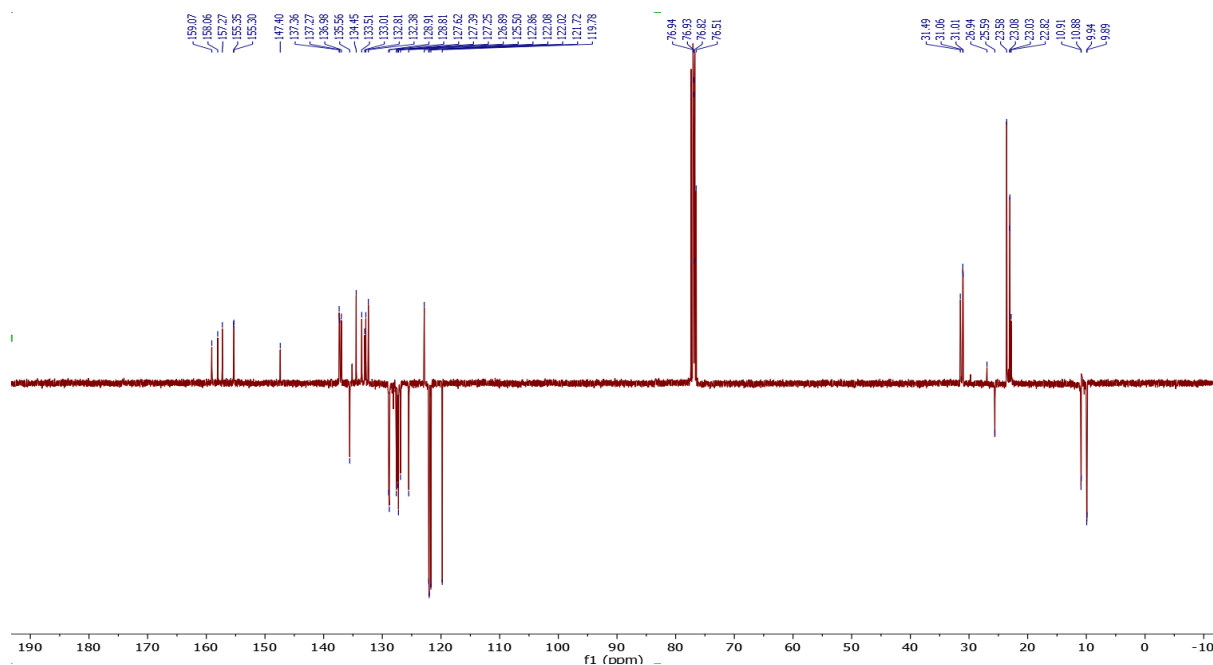

**Figure S2:**  $^{13}\text{C}$ (APT) NMR of compound 4a ( $\text{CDCl}_3$ , 100 MHz).

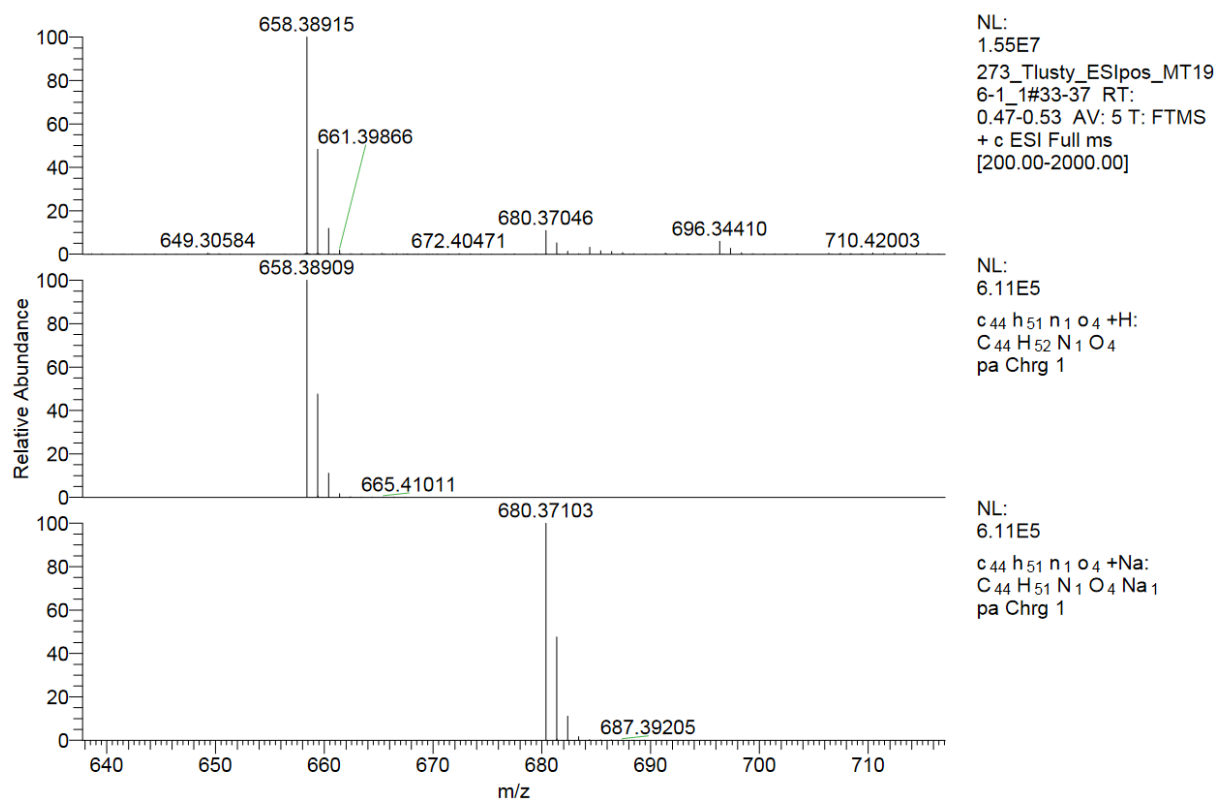

Figure S3: HRMS of compound 4a (ESI<sup>+</sup>).

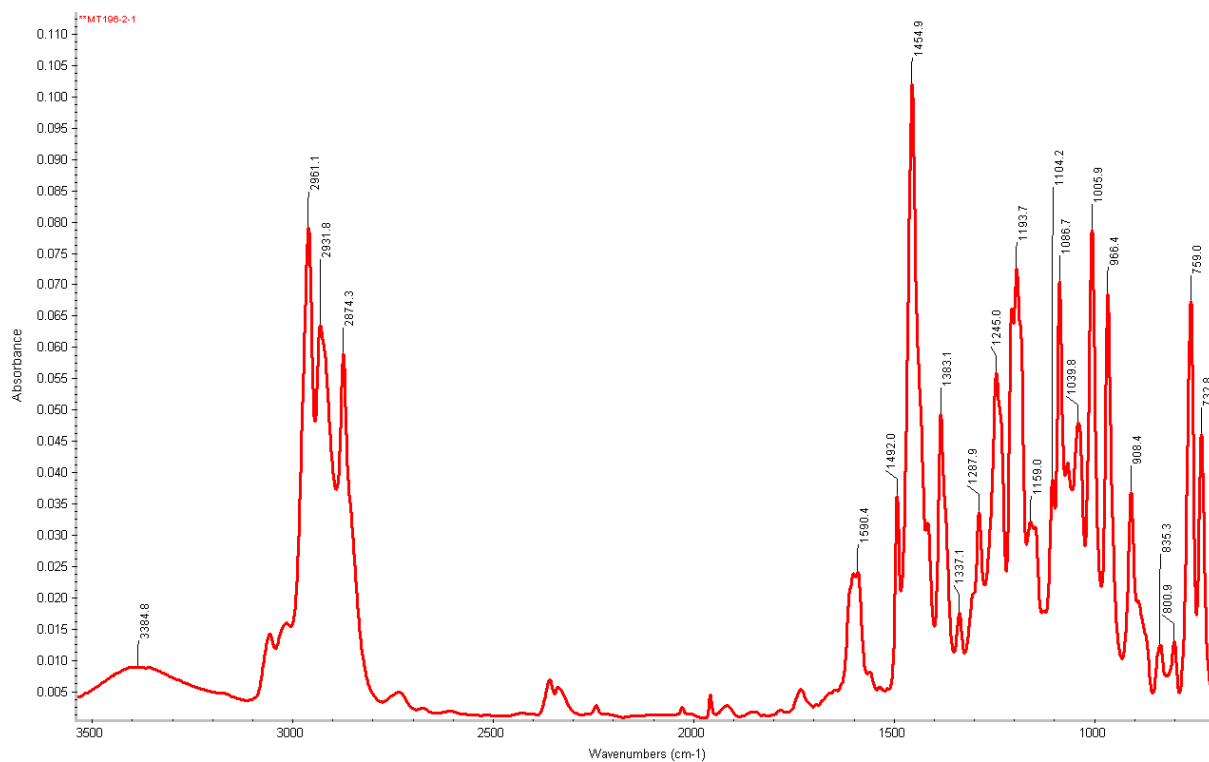

Figure S4: IR of compound 4a (KBr).

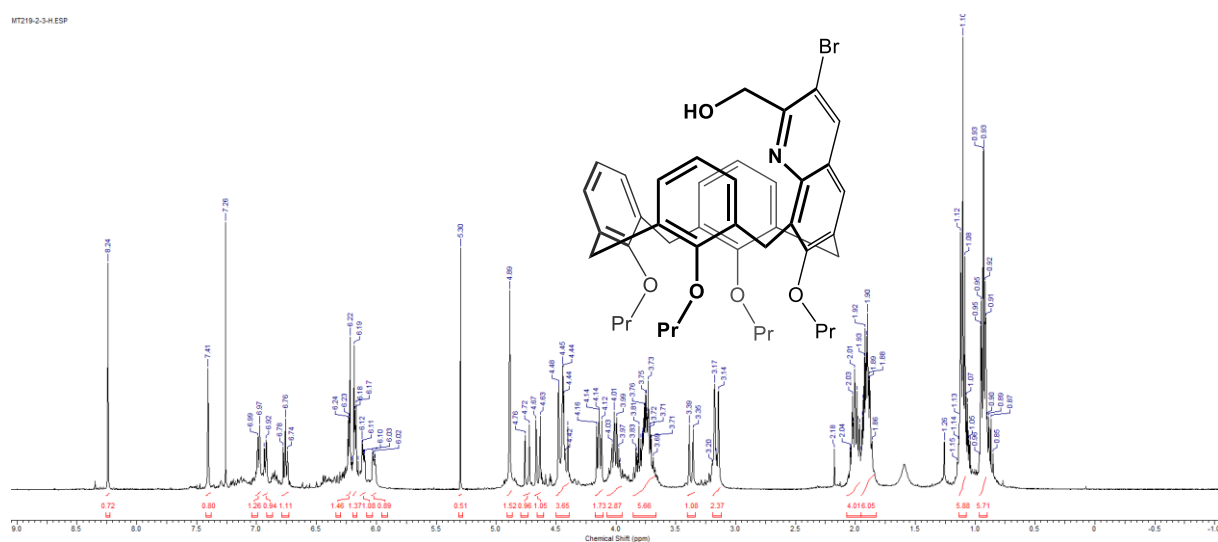

Figure S5:  $^1\text{H}$  NMR of compound **4b** (CDCl<sub>3</sub>, 400 MHz).

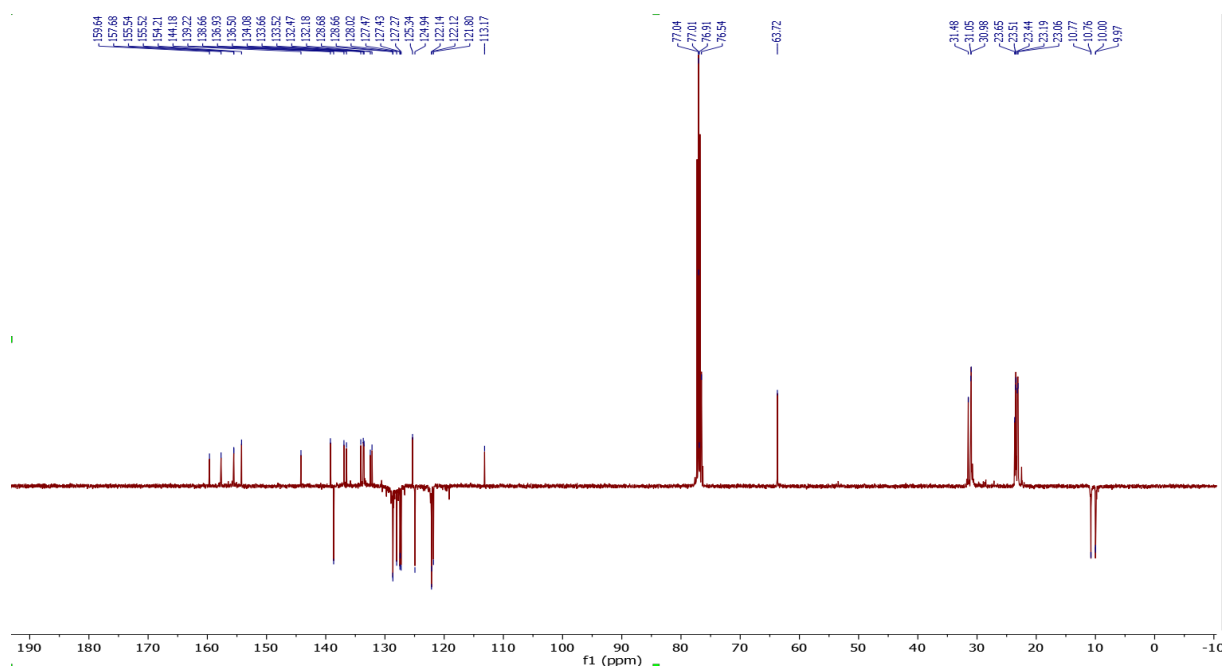

Figure S6:  $^{13}\text{C}$ (APT) NMR of compound **4b** (CDCl<sub>3</sub>, 100 MHz).

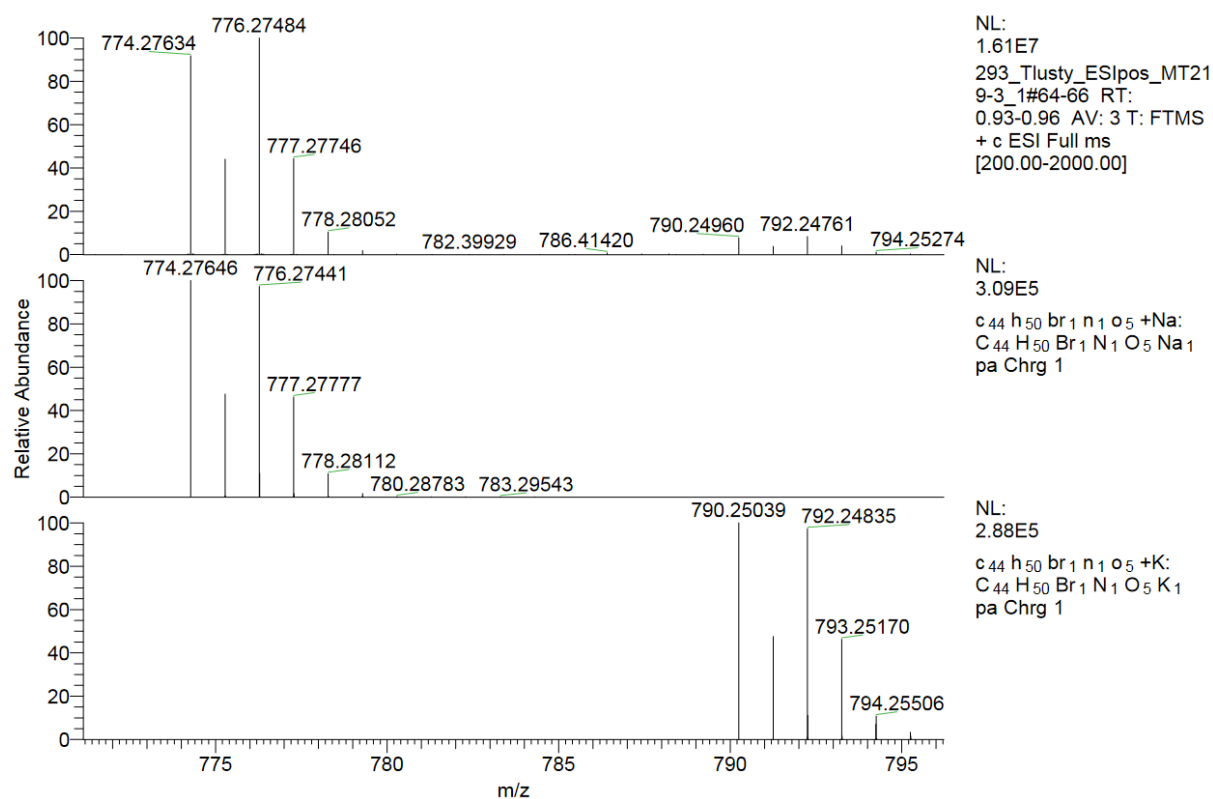

**Figure S7:** HRMS of compound **4b** (ESI<sup>+</sup>).

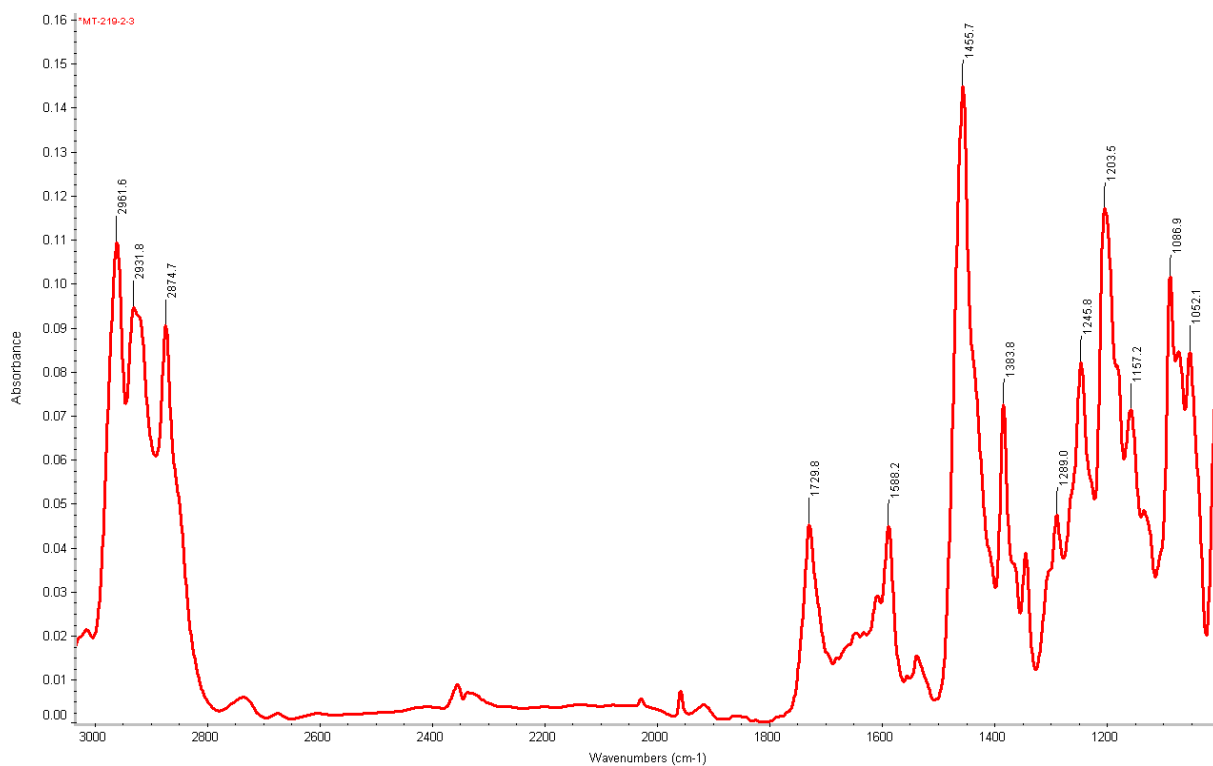

**Figure S8:** IR of compound **4b** (KBr).

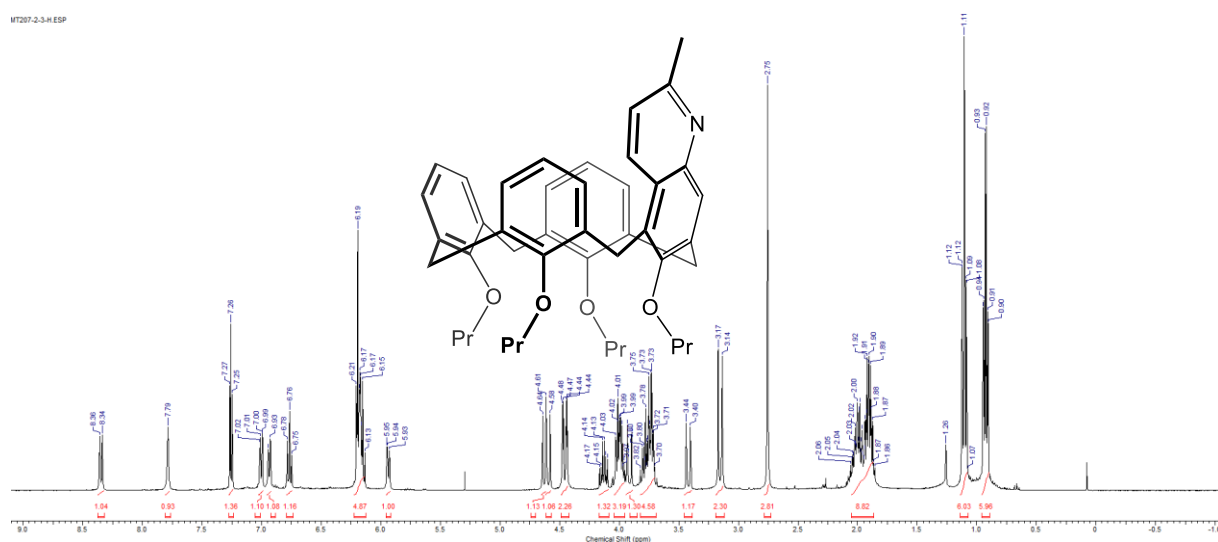

**Figure S9:**  $^1\text{H}$  NMR of compound 6a ( $\text{CDCl}_3$ , 400 MHz).

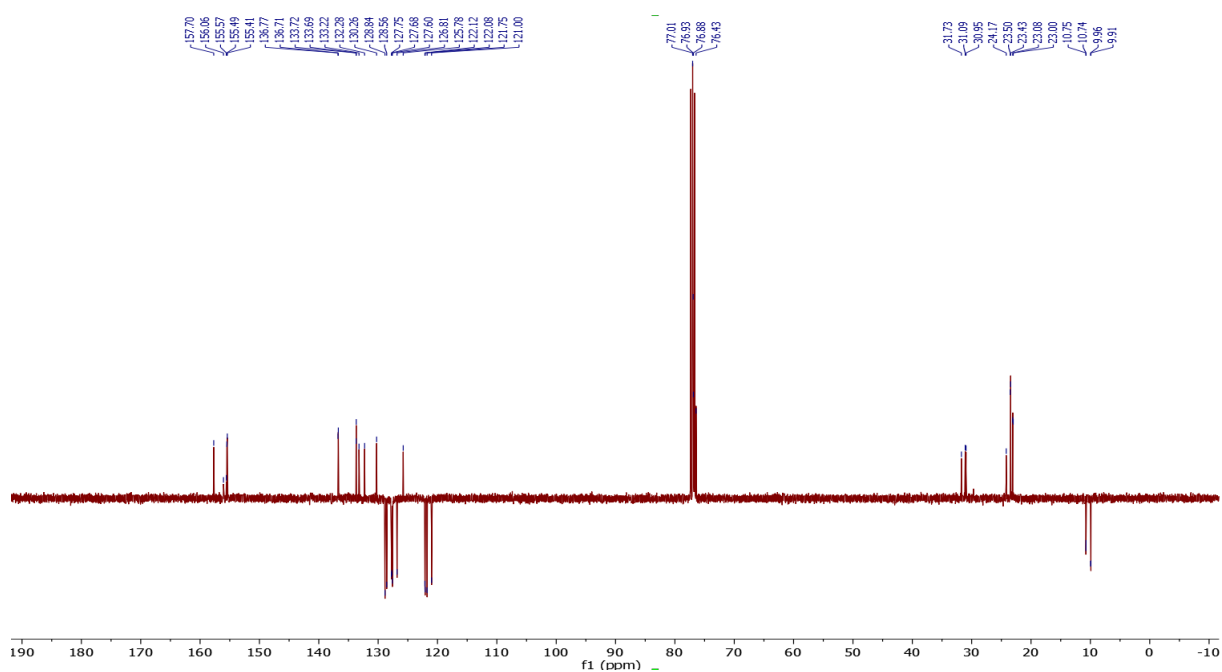

**Figure S10:**  $^{13}\text{C}$ (APT) NMR of compound 6a ( $\text{CDCl}_3$ , 100 MHz).

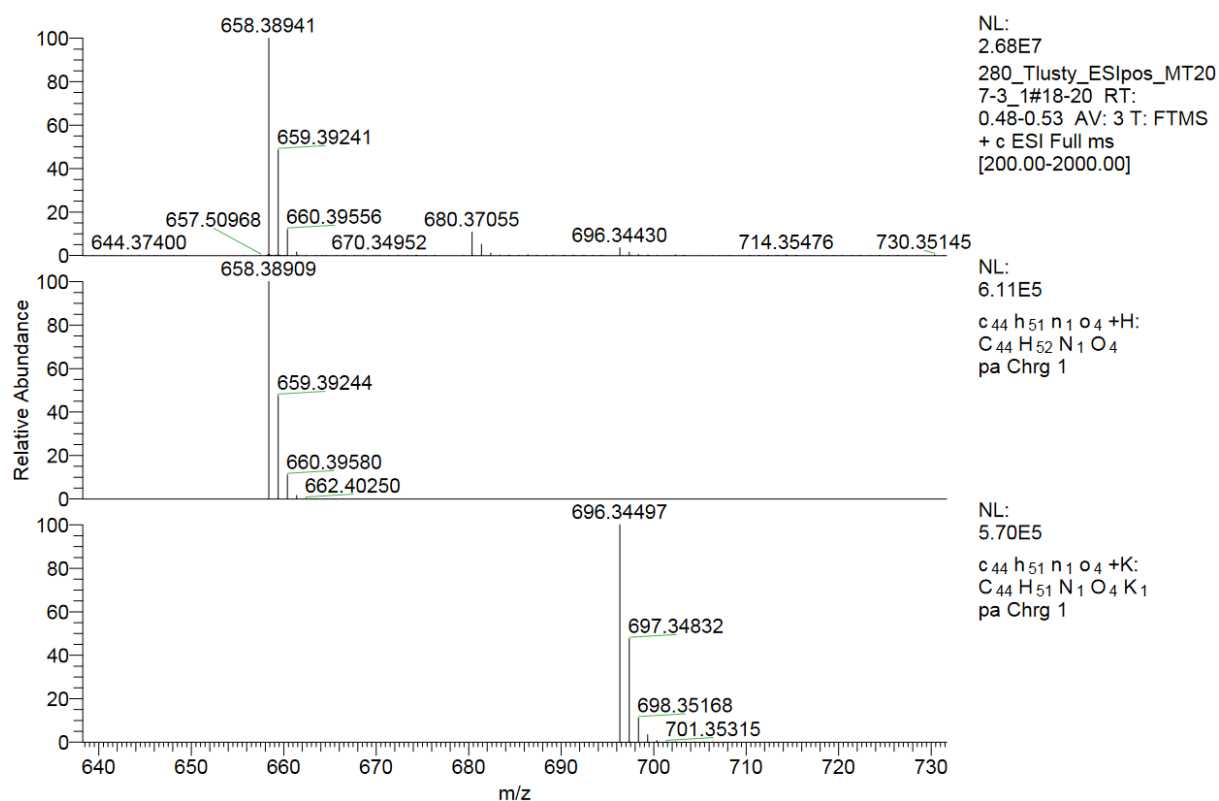

**Figure S11:** HRMS of compound **6a** (ESI<sup>+</sup>).

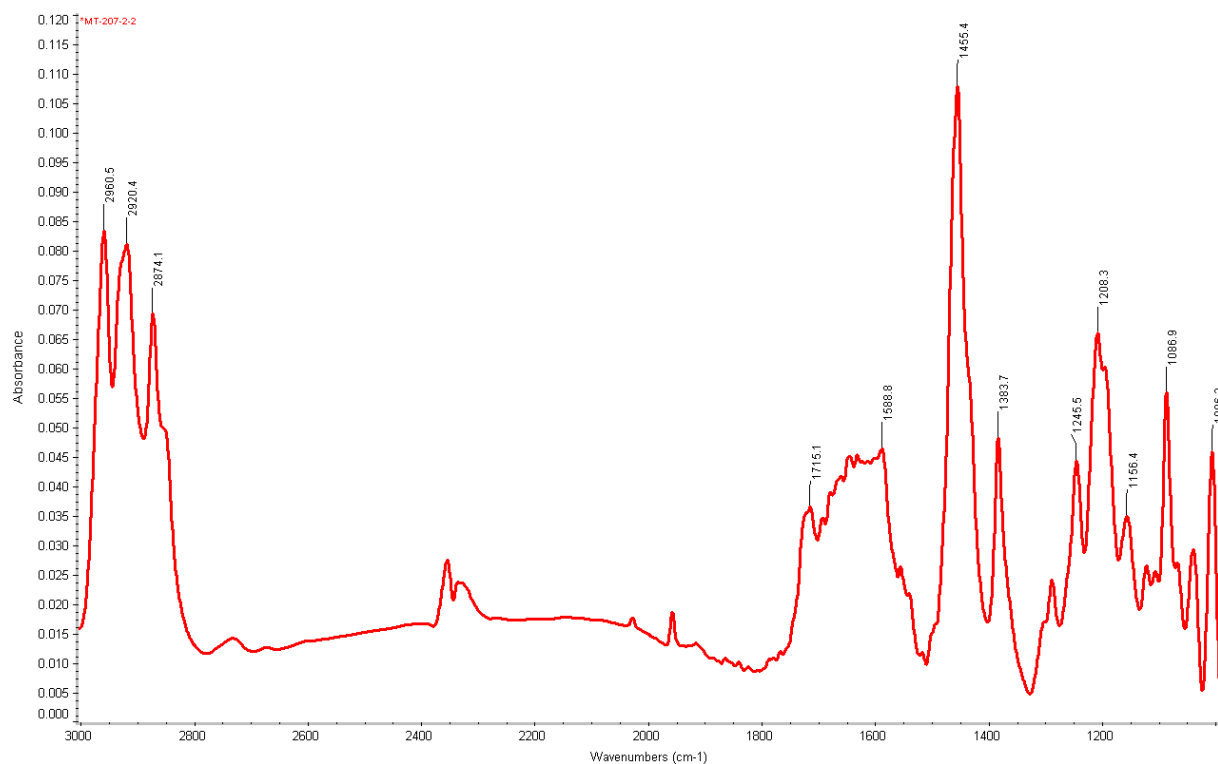

**Figure S12:** IR of compound **6a** (KBr).

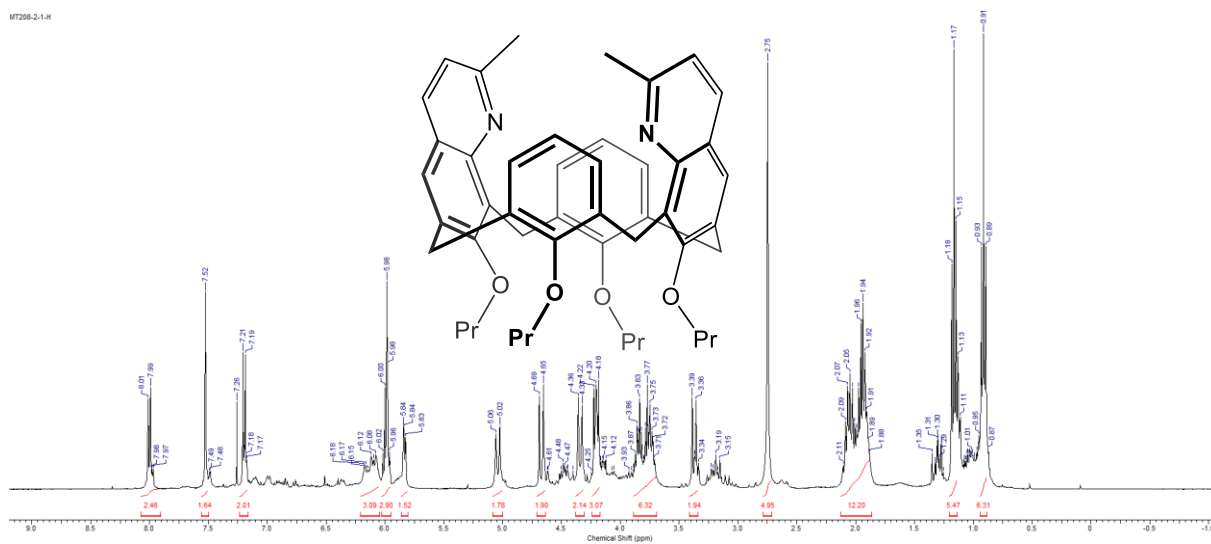

**Figure S13:**  $^1\text{H}$  NMR of compound **14** ( $\text{CDCl}_3$ , 400 MHz).

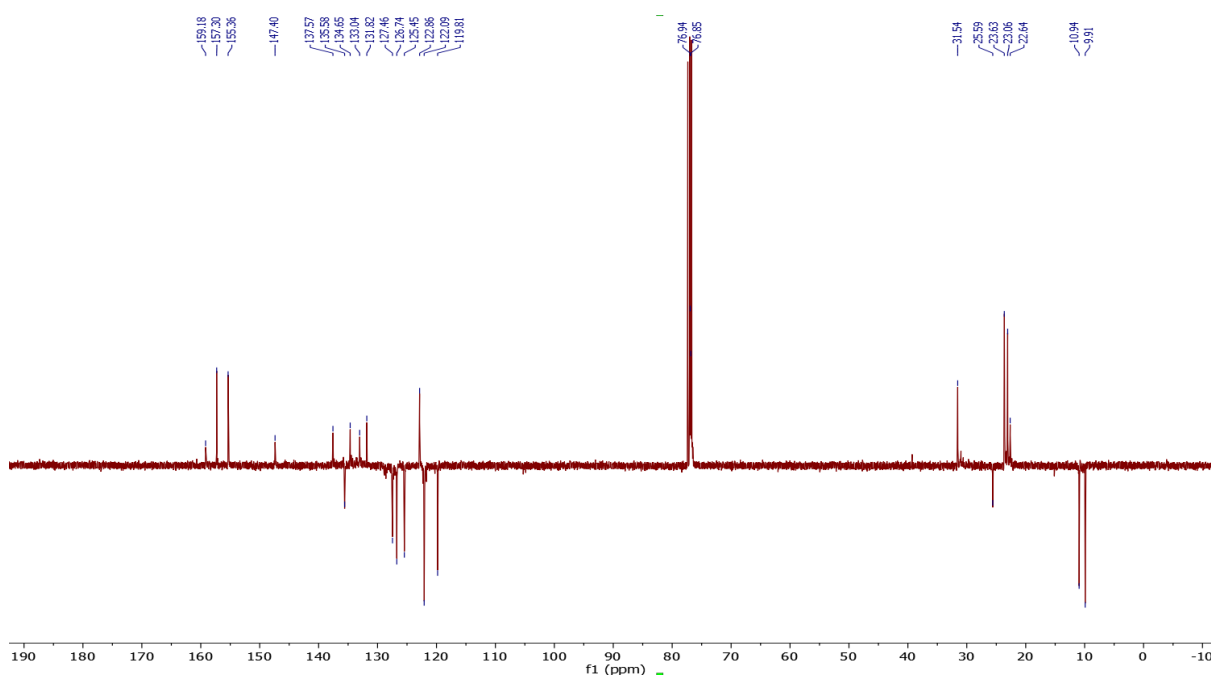

**Figure S14:**  $^{13}\text{C}$ (APT) NMR of compound **14** ( $\text{CDCl}_3$ , 100 MHz).

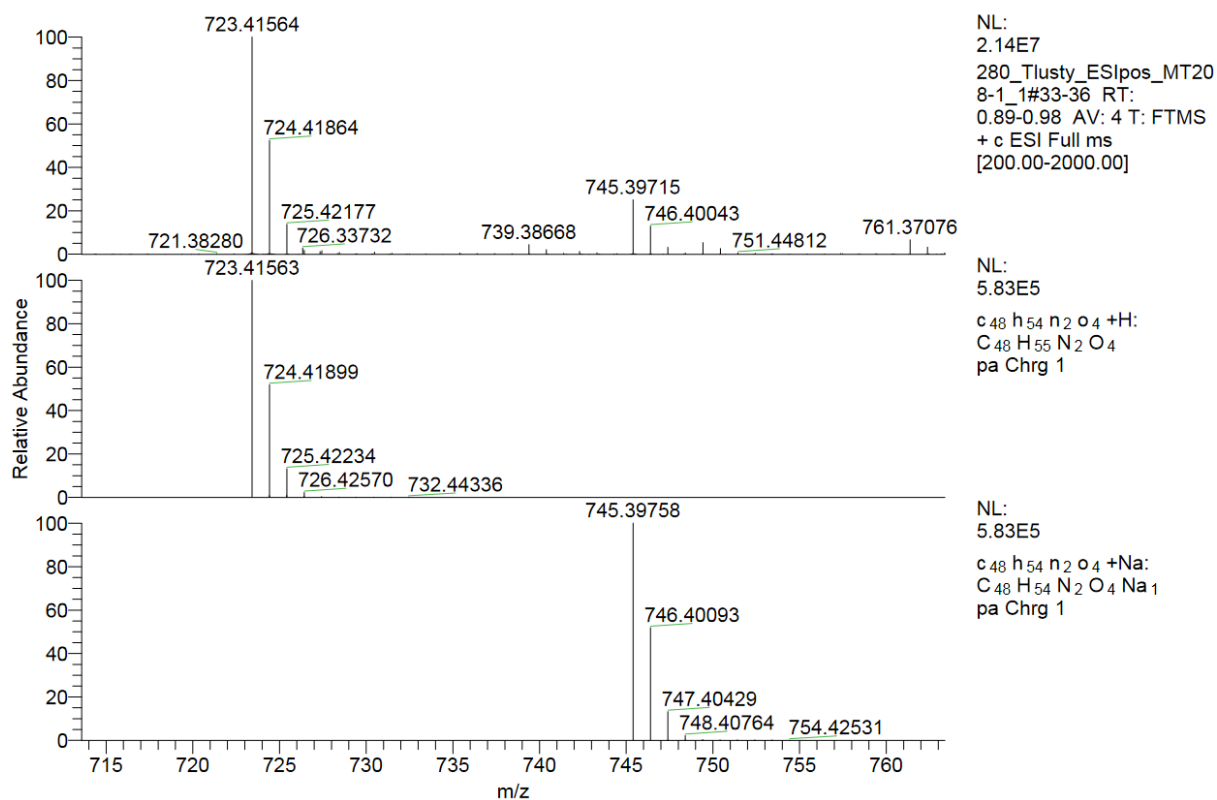

**Figure S15:** HRMS of compound **14** (ESI<sup>+</sup>).

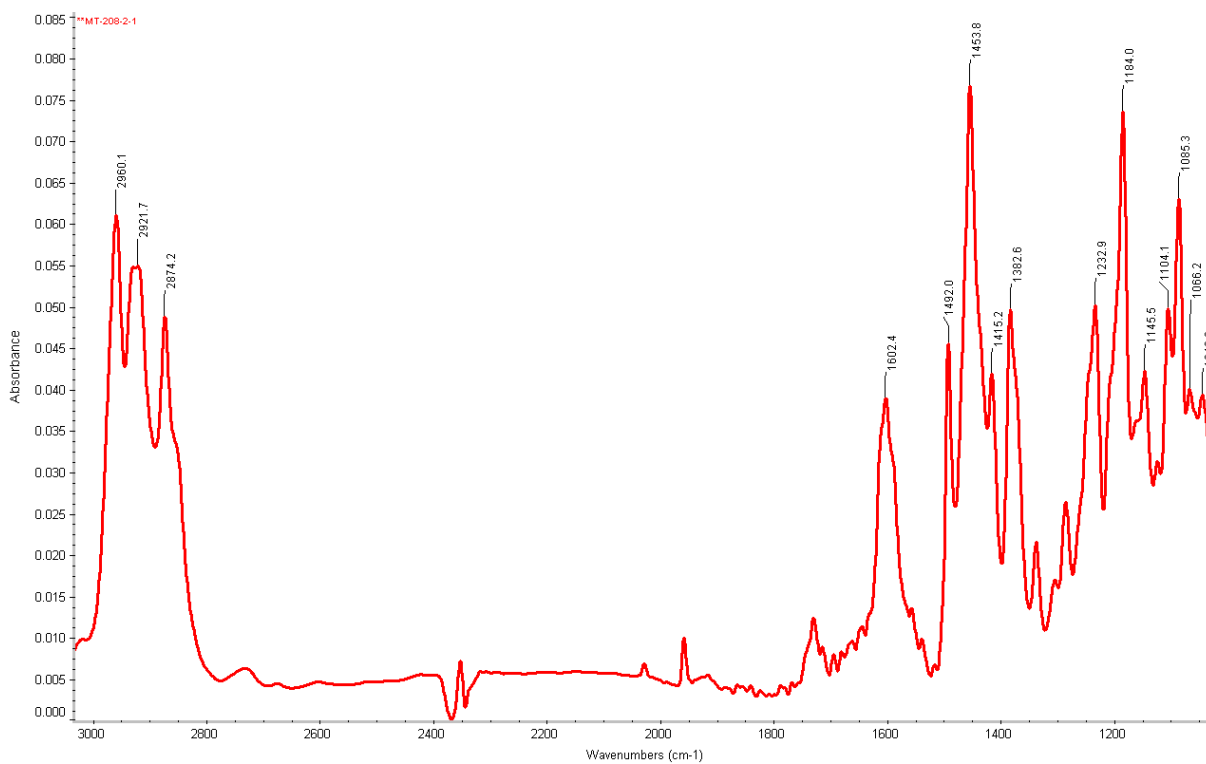

**Figure S16:** IR of compound **14** (KBr).

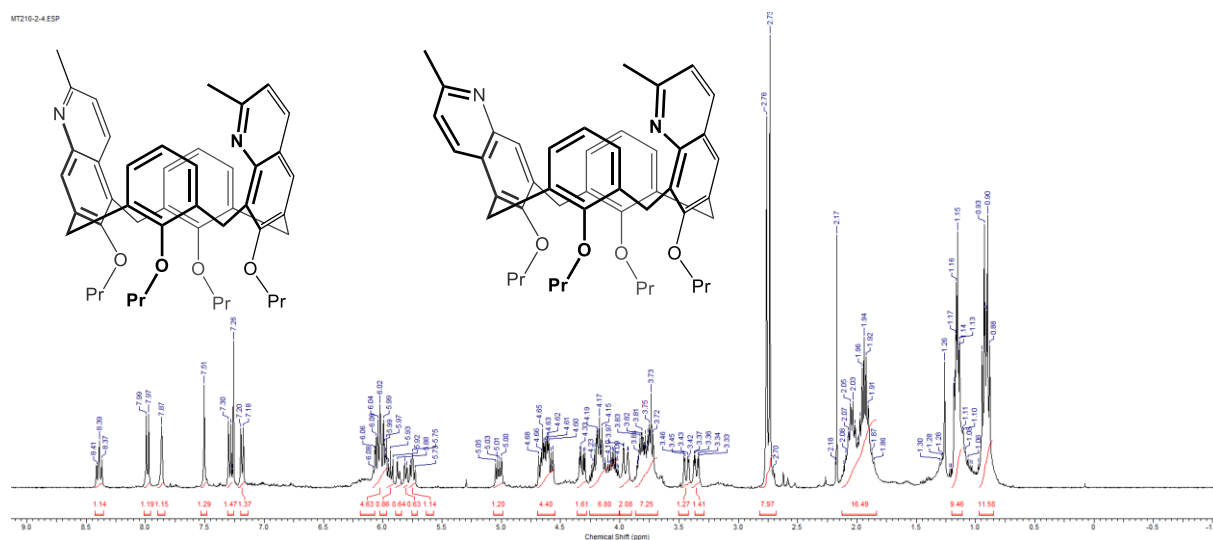

**Figure S17:**  $^1\text{H}$  NMR of the mixture of compounds **15a** and **15b** ( $\text{CDCl}_3$ , 400 MHz).

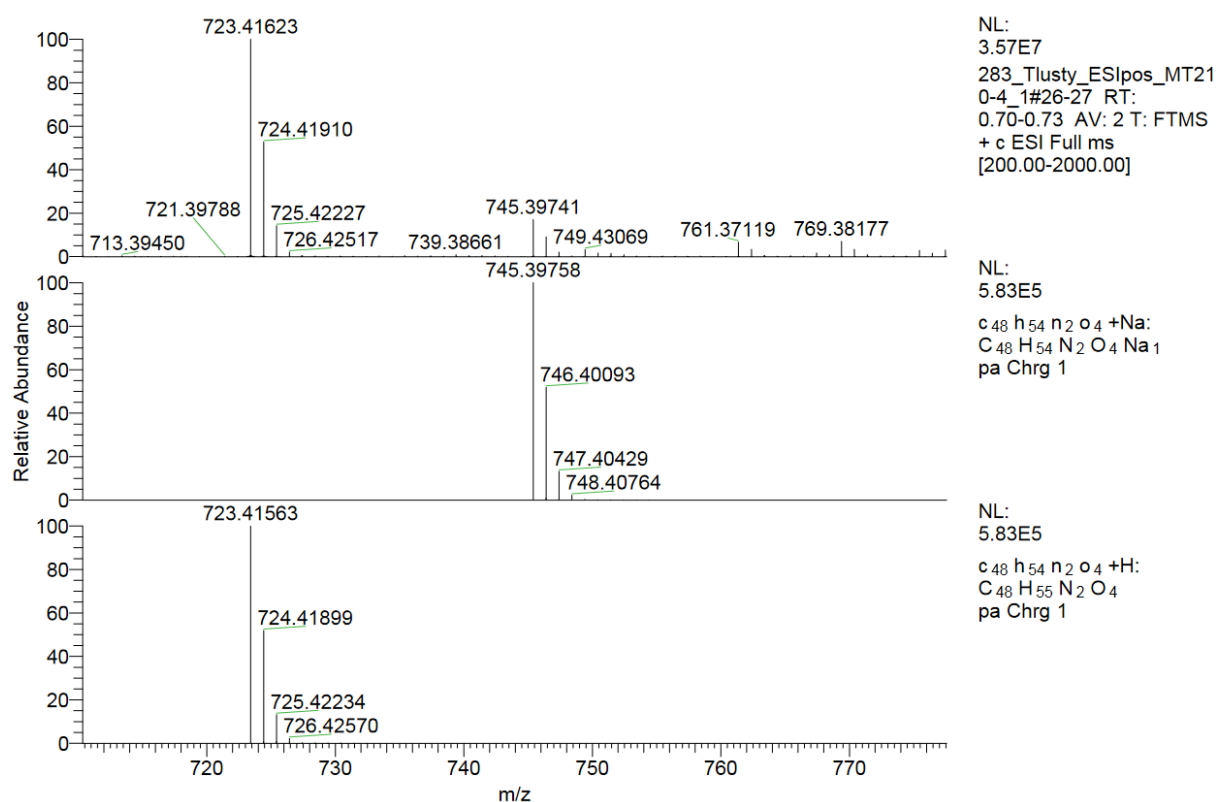

**Figure S18:** HRMS of the mixture of compounds **15a** and **15b** ( $\text{ESI}^+$ ).

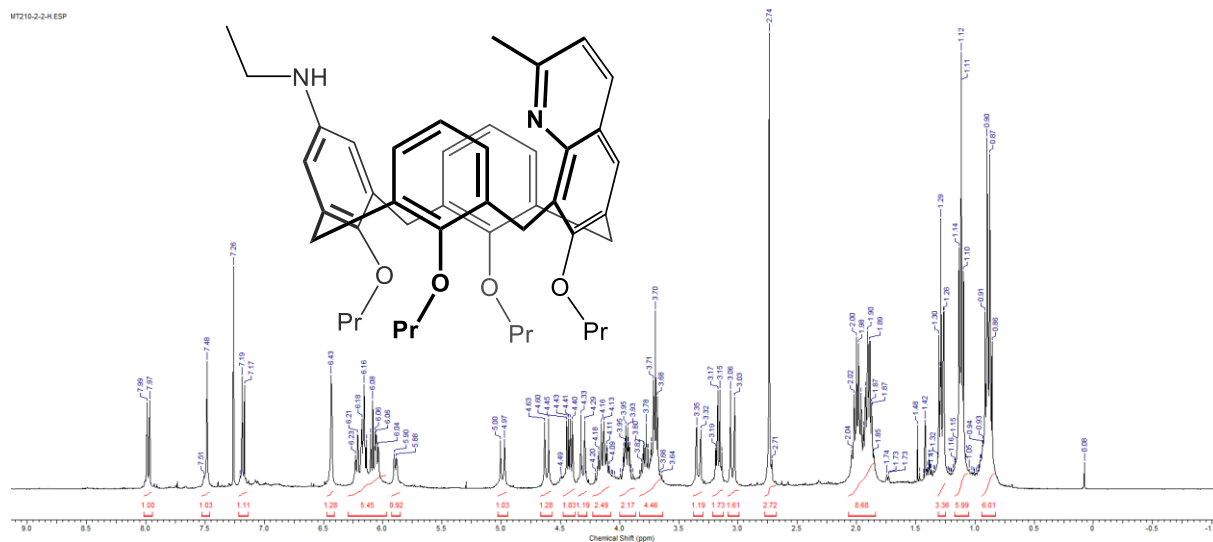

**Figure S19:**  $^1\text{H}$  NMR of compound **15c** ( $\text{CDCl}_3$ , 400 MHz).

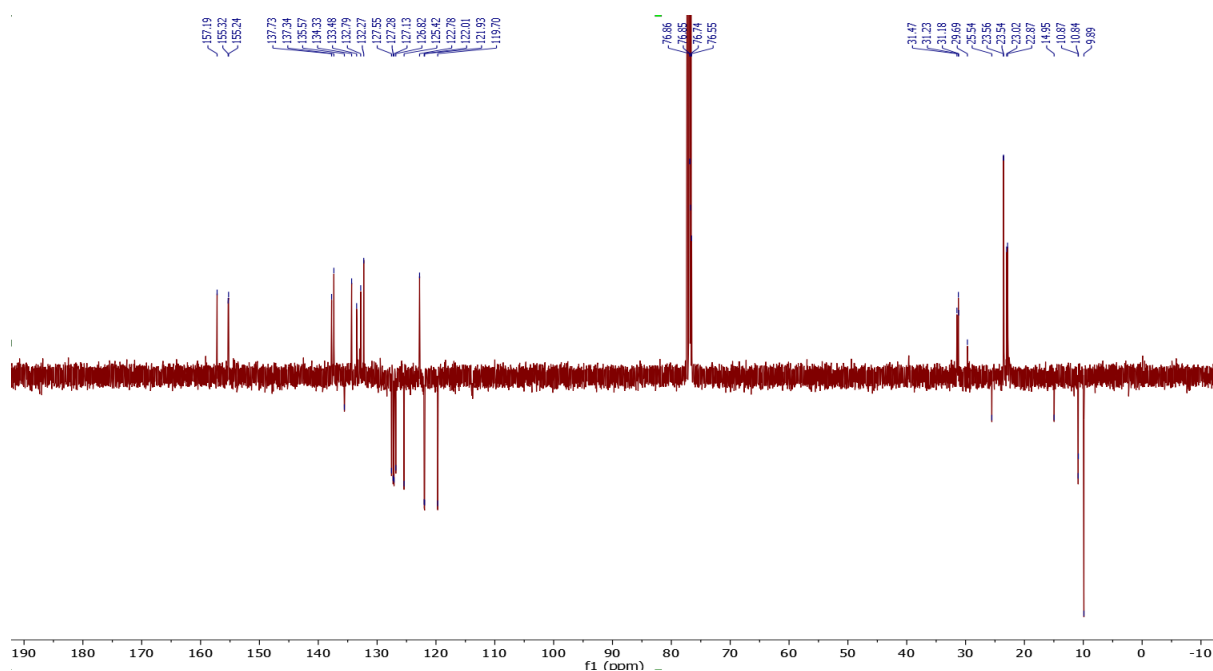

**Figure S20:**  $^{13}\text{C}$ (APT) NMR of compound **15c** ( $\text{CDCl}_3$ , 100 MHz).

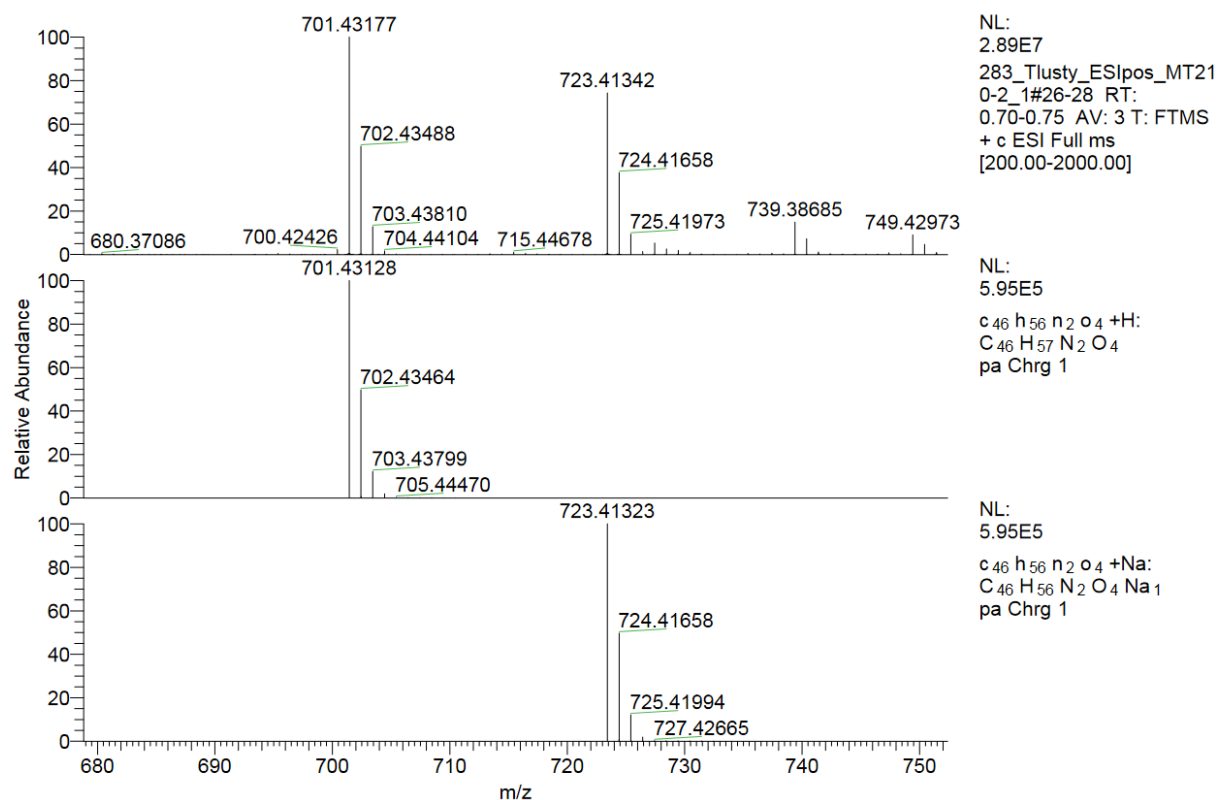

**Figure S21:** HRMS of compound **15c** (ESI<sup>+</sup>).

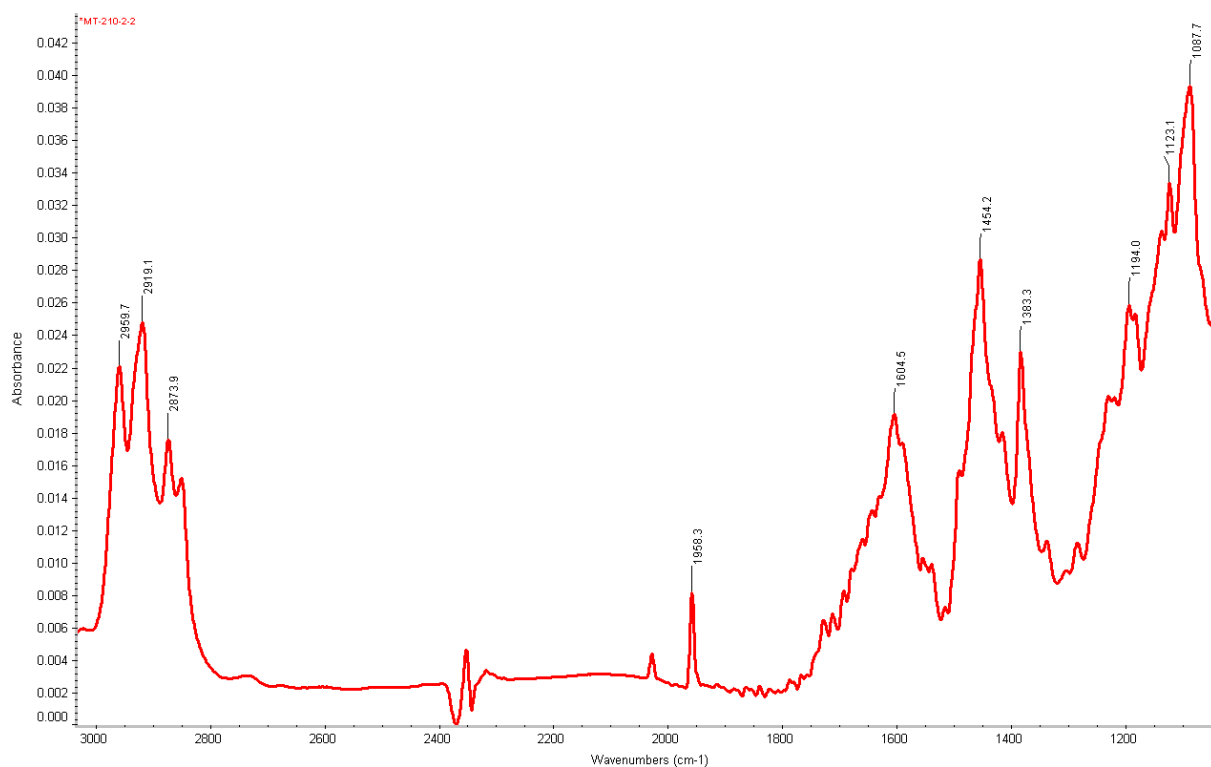

**Figure S22:** IR of compound **15c** (KBr).

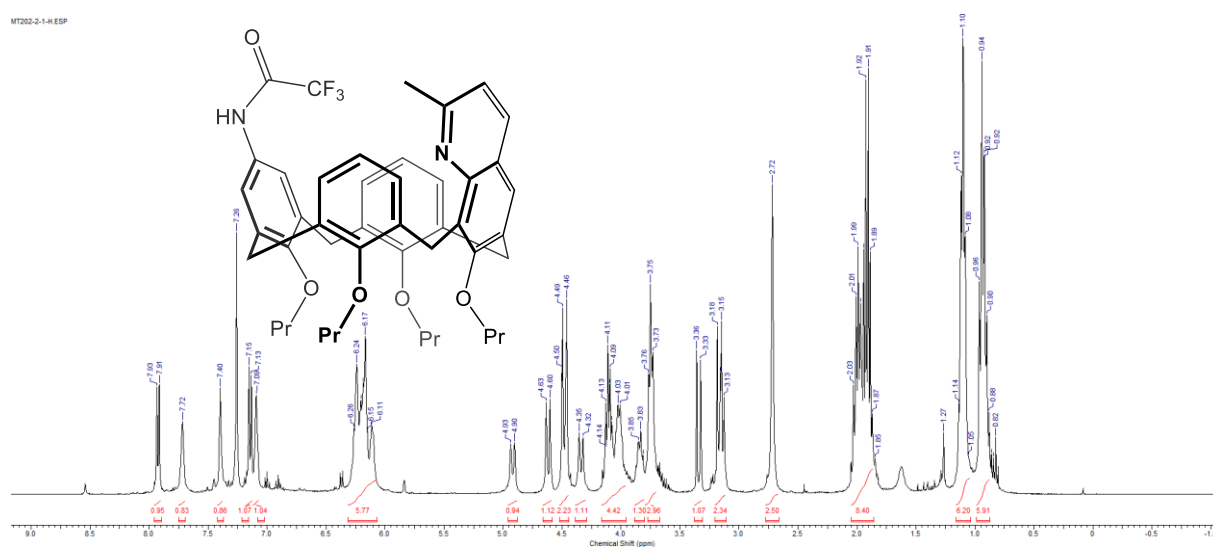

**Figure S23:** <sup>1</sup>H NMR of compound 16 (CDCl<sub>3</sub>, 400 MHz).

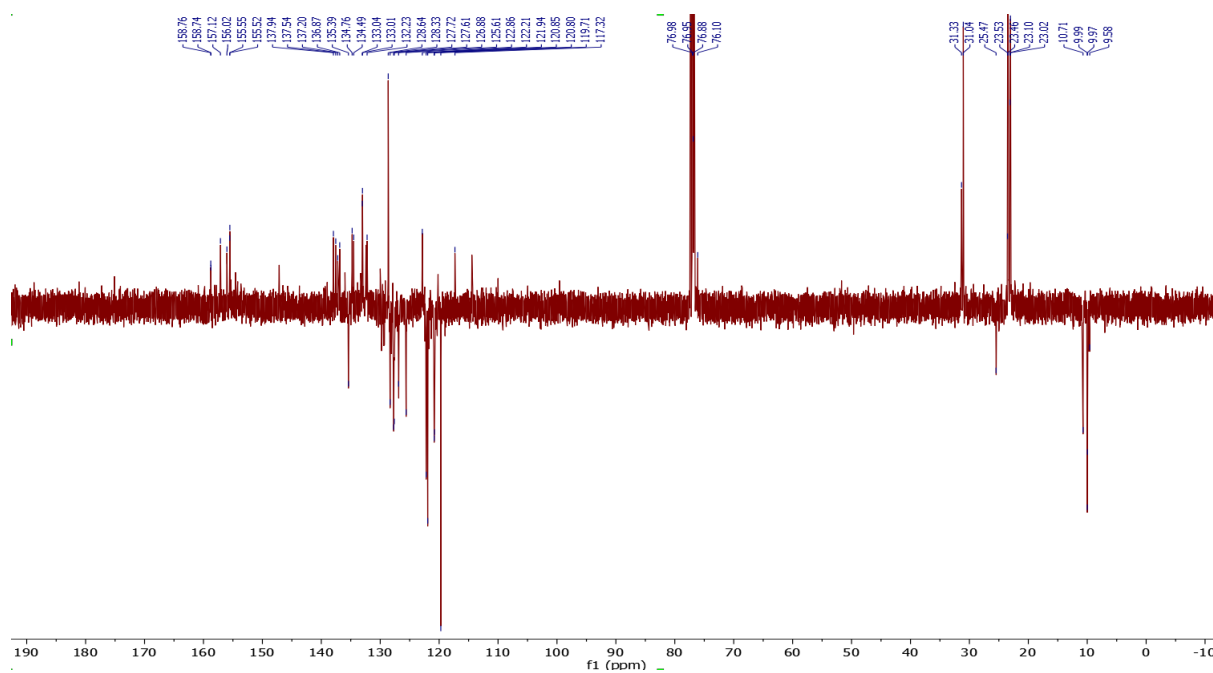

**Figure S24:** <sup>13</sup>C(APT) NMR of compound 16 (CDCl<sub>3</sub>, 100 MHz).

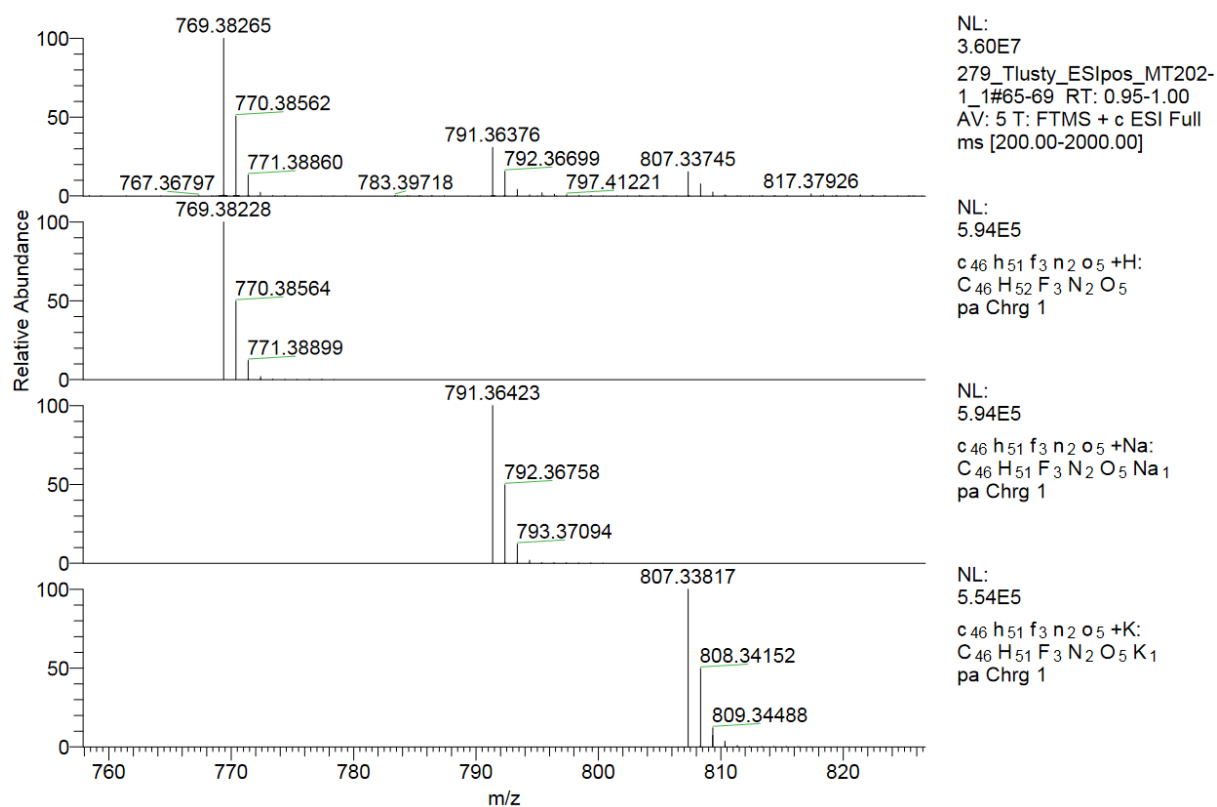

**Figure S25:** HRMS of compound 16 (ESI<sup>+</sup>).

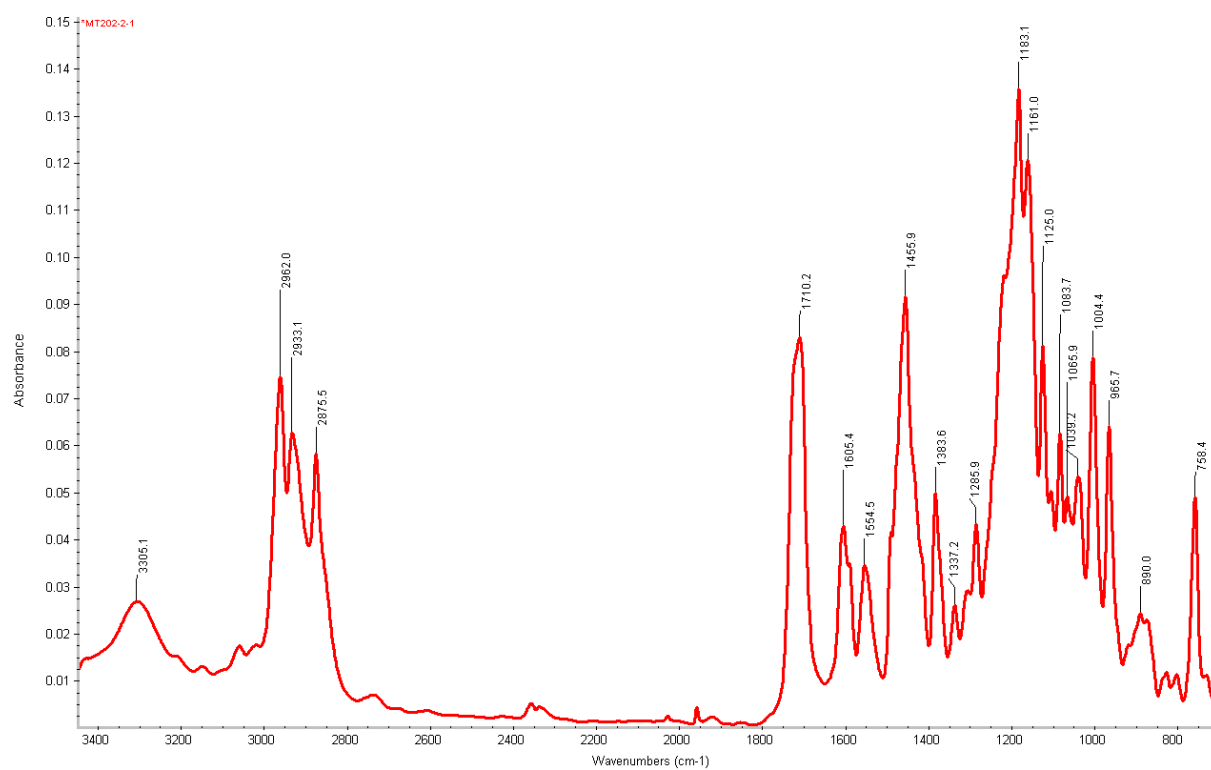

**Figure S26:** IR of compound 16 (KBr).

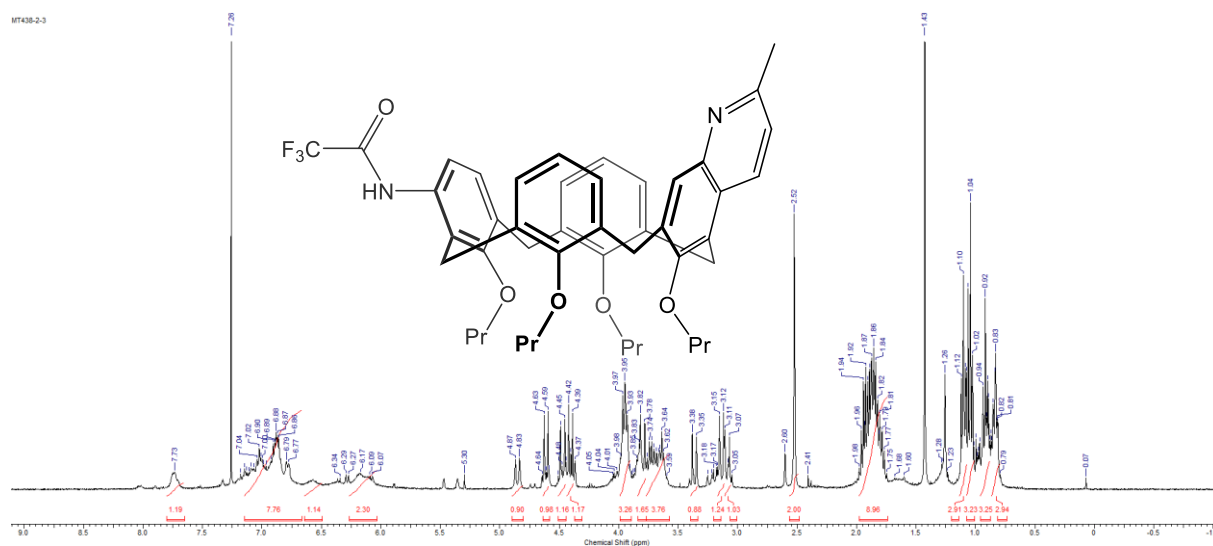

**Figure S27:**  $^1\text{H}$  NMR of compound **17a** (CDCl<sub>3</sub>, 400 MHz).

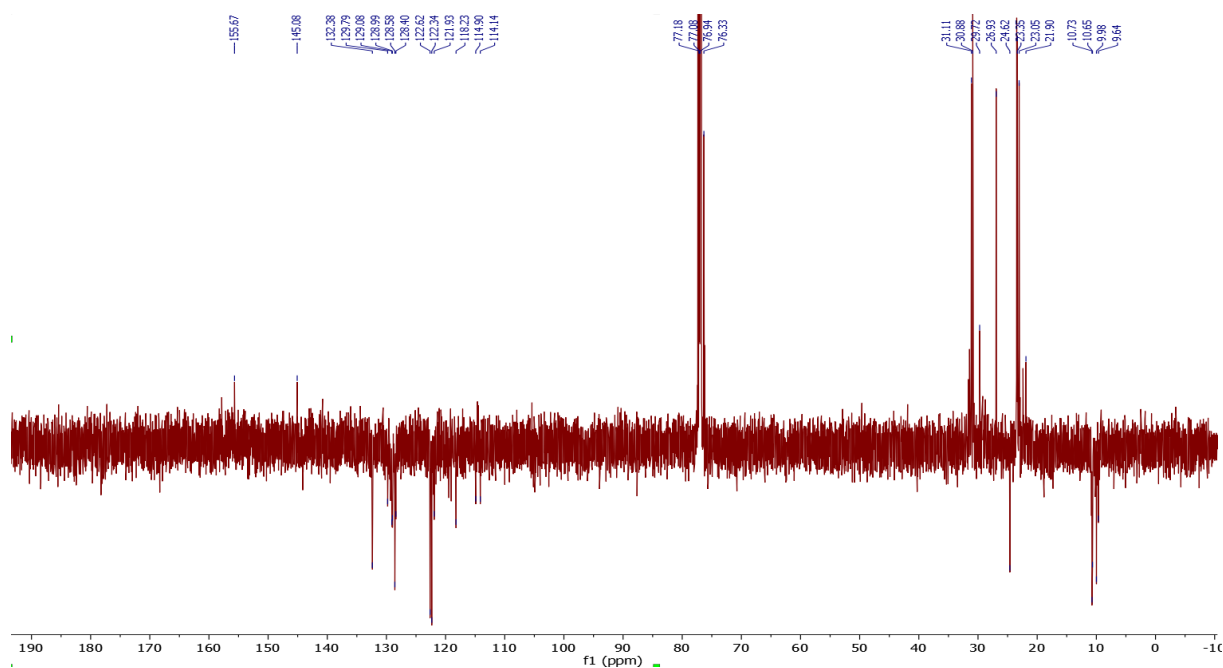

**Figure S28:**  $^{13}\text{C}$ (APT) NMR of compound **17a** (CDCl<sub>3</sub>, 100 MHz).

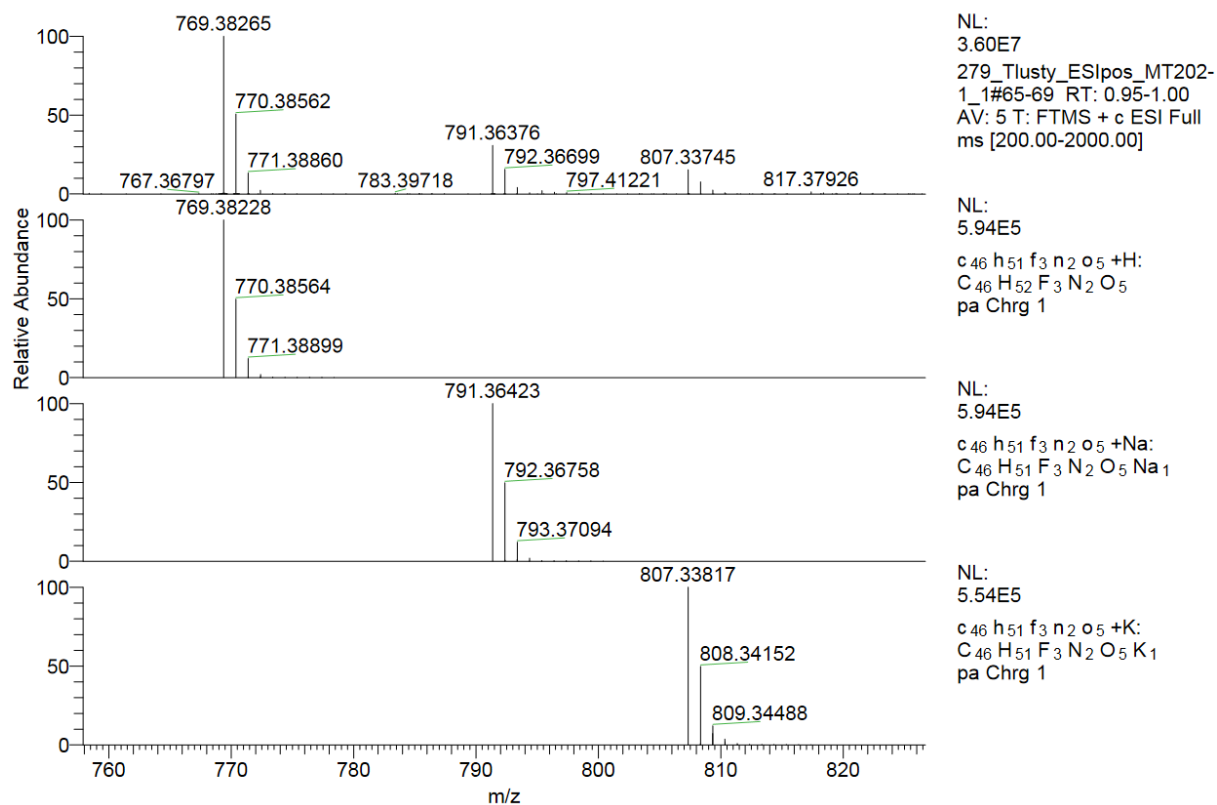

**Figure S29:** HRMS of compound 17a (ESI<sup>+</sup>).

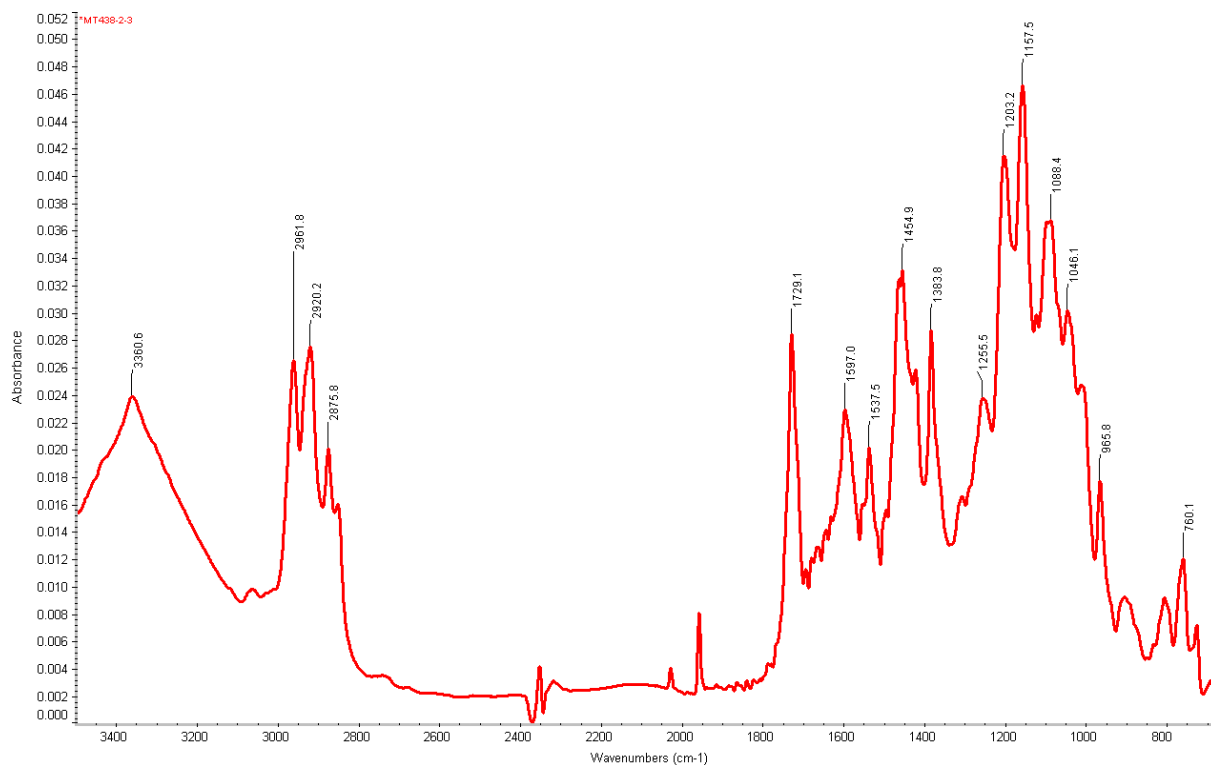

**Figure S30:** IR of compound 17a (KBr).

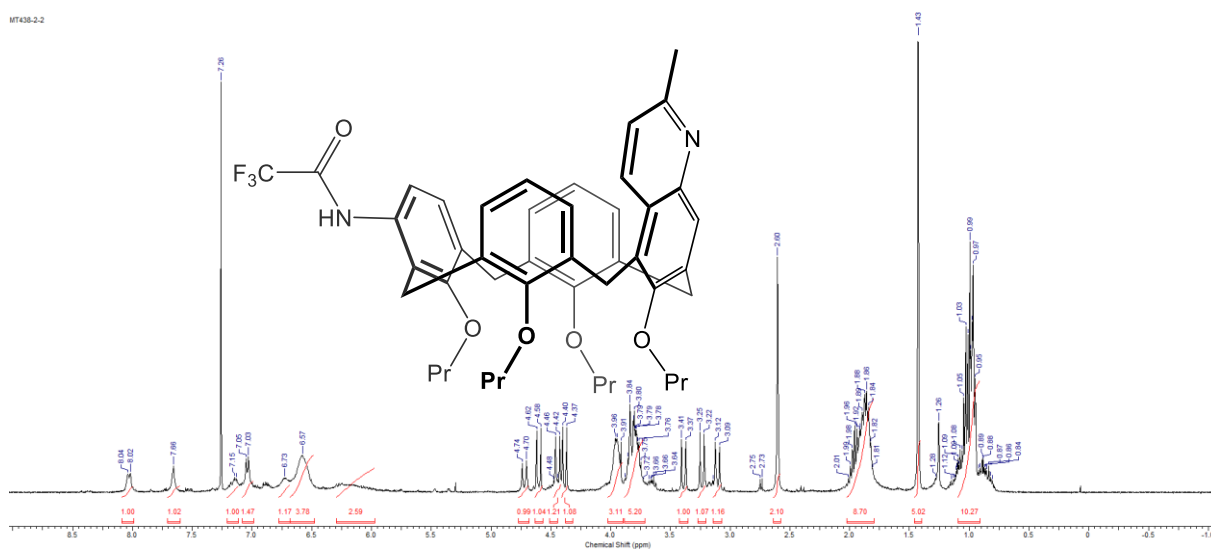

**Figure S31:**  $^1\text{H}$  NMR of compound **17b** (CDCl<sub>3</sub>, 400 MHz).

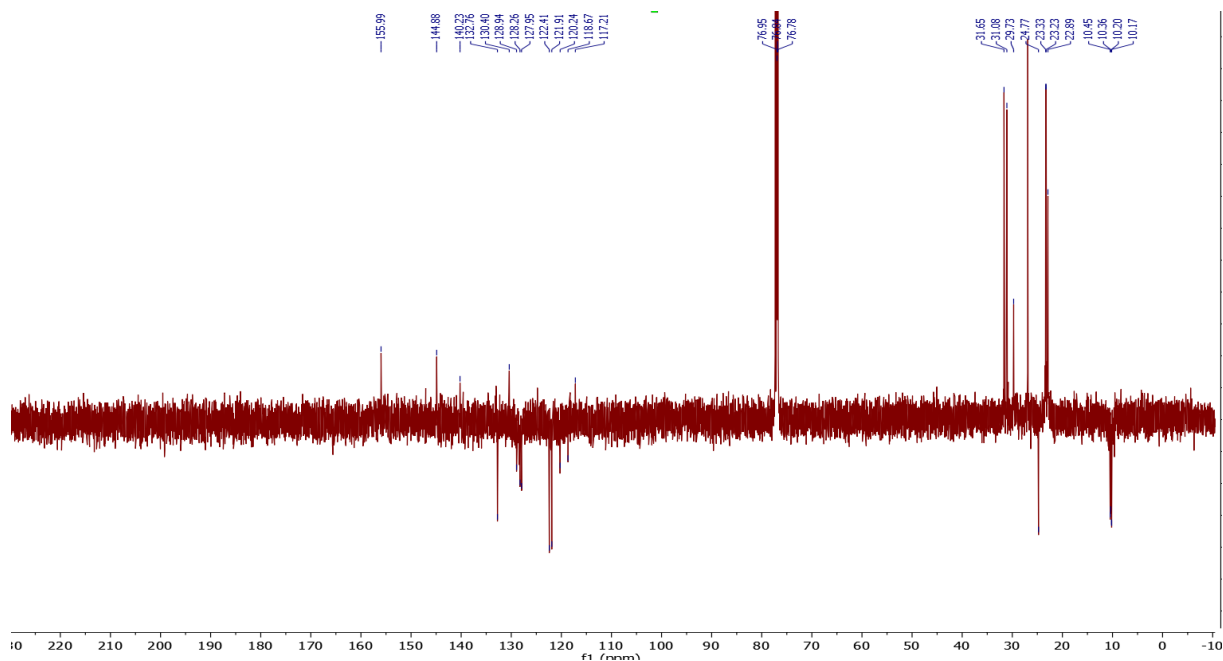

**Figure S32:**  $^{13}\text{C}$ (APT) NMR of compound **17b** (CDCl<sub>3</sub>, 100 MHz).

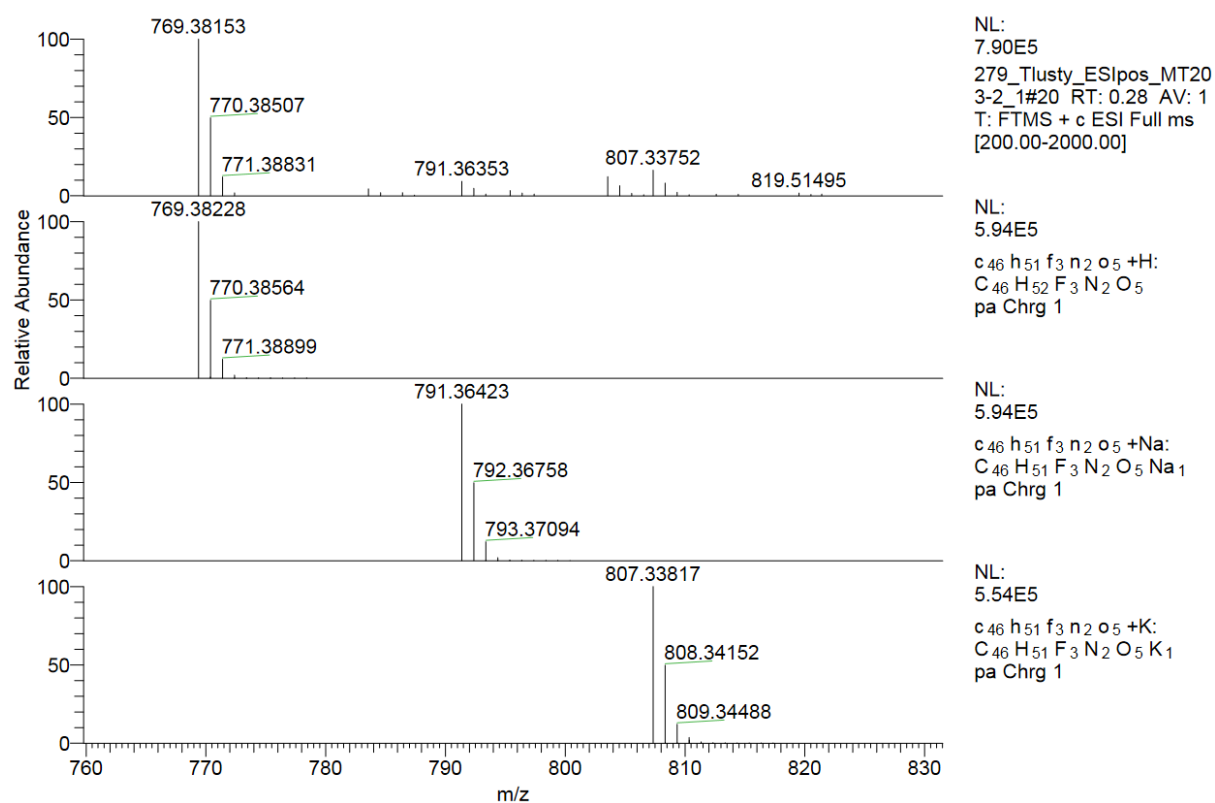

Figure S33: HRMS of compound **17b**(ESI<sup>+</sup>).

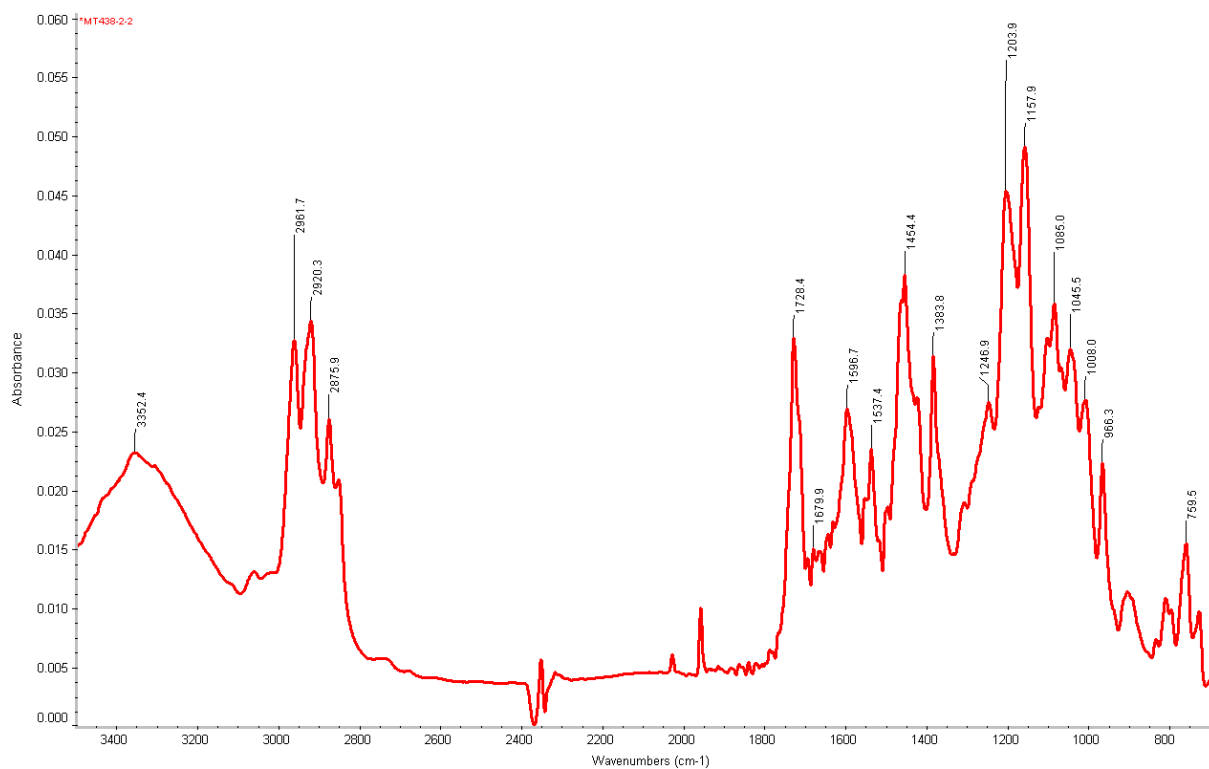

Figure S34: IR of compound **17b** (KBr).

## 2. Crystallographic data

### *Crystallographic data for 16*

$M = 800.94 \text{ g.mol}^{-1}$ , triclinic system, space group  $P-1$ ,  $a = 15.52150 (2) \text{ \AA}$ ,  $b = 18.08924 (3) \text{ \AA}$ ,  $c = 18.11720 (2) \text{ \AA}$ ,  $\alpha = 77.920 (3)^\circ$ ,  $\beta = 71.014 (2)^\circ$ ,  $\gamma = 64.684 (2)^\circ$ ,  $Z = 4$ ,  $V = 4333.46 (9) \text{ \AA}^3$ ,  $D_c = 1.228 \text{ g.cm}^{-3}$ ,  $\mu(\text{Cu-K}\alpha) = 0.73 \text{ mm}^{-1}$ , crystal dimensions of  $0.41 \times 0.29 \times 0.26 \text{ mm}$ . Data were collected at  $200 (2) \text{ K}$  on a Bruker D8 Venture Photon CMOS diffractometer with Incoatec microfocus sealed tube Cu-K $\alpha$  radiation. The structure was solved by charge flipping methods [1] and anisotropically refined by full matrix least squares on  $F$  squared using the CRYSTALS [2] to final value  $R = 0.085$  and  $wR = 0.242$  using 15813 independent reflections ( $\theta_{\text{max}} = 68.4^\circ$ ), 1370 parameters and 481 restraints. The hydrogen atoms bonded to carbon atoms were placed in calculated positions refined with a riding constraints, while hydrogen atoms bonded to oxygen and nitrogen were refined using soft restraints. The disordered functional groups positions were found in difference electron density maps and refined with restrained geometry. MCE [3] was used for visualization of electron density maps. The occupancy of disordered functional group was constrained to full. The structure was deposited into Cambridge Structural Database under number CCDC 2215763.

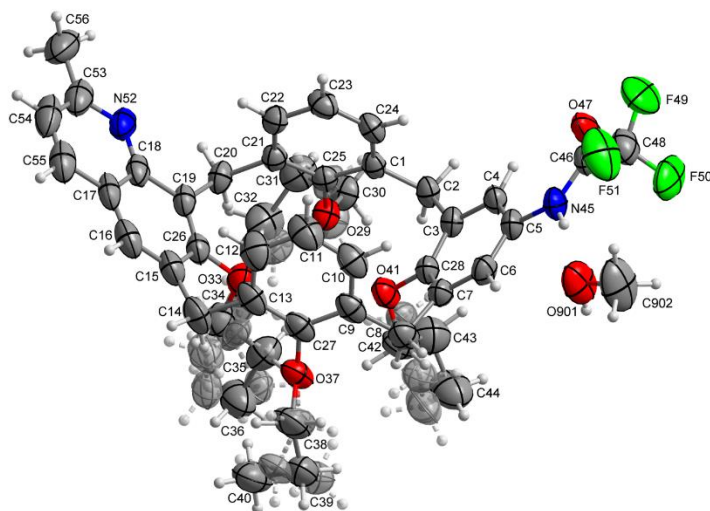

**Figure S35:** The molecule 1 of crystal structure of **16**, the ADPs drawn at 50% probability level. The weakly occupied atoms depicted as transparent. The atomic labels of weakly occupied atoms were omitted for clarity.

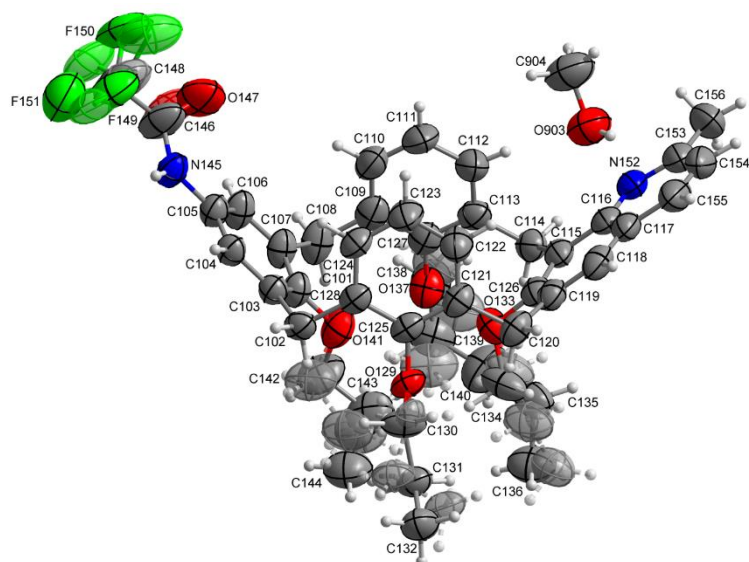

**Figure S36:** The molecule 2 of crystal structure of **16**, the ADPs drawn at 50% probability level. The weakly occupied atoms depicted as transparent. The atomic labels of weakly occupied atoms were omitted for clarity.

- [1] Palatinus, L.; Chapuis, G., SUPERFLIP - a computer program for the solution of crystal structures by charge flipping in arbitrary dimensions. *Journal of Applied crystallography* **2007**, 40, 786-790.
- [2] Betteridge, P. W.; Carruthers, J. R.; Cooper, R. I.; Prout, K.; Watkin, D. J., Software for guided crystal structure analysis. *Journal of Applied crystallography* **2003**, 36, 1487.
- [3] Rohlicek, J.; Husak, M., MCE2005 - a new version of a program for fast interactive visualization of electron and similar density maps optimized for small molecules. *Journal of Applied crystallography* **2007**, 40, 600-601.

### 3. Chiral separation

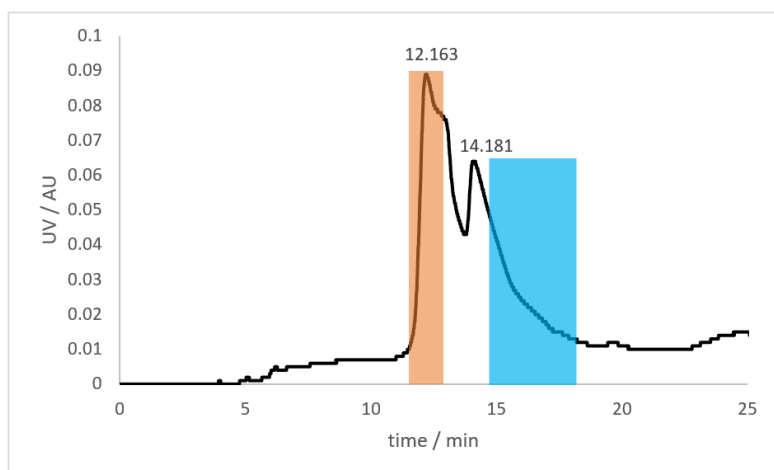

**Figure S37:** Preparative enantioseparation of **6a** on ChiralArt Amylose-SA (250 × 20 mm ID, 5 µm) in cyclohexane/DCM: 92/8, v/v at ambient temperature, flow rate 20 ml·min<sup>-1</sup>, detection wavelength 350 nm, the collected fractions highlighted in orange (**6a\_1**) and blue (**6a\_2**).

## 4. Titration experiments

Calixarene **4a** was dissolved in a specified amount of  $\text{C}_2\text{D}_2\text{Cl}_4$ . 0.5 ml of calixarene solution was put in an NMR tube. To the calixarene solution (1.5 ml), a specific amount of *N*-methylpyridinium iodide (NMPI) was added. The aliquots of NMPI were gradually added to the NMR tube to achieve different calixarene/guest ratios (1:0.000-49.464), ensuring constant host concentration during the experiment. The complexation constant was determined by analyzing CIS of host protons using nonlinear curve-fitting procedure (program BindFit).

|                                        |                |                                        |               |
|----------------------------------------|----------------|----------------------------------------|---------------|
| M(NMPI)                                | 221.0415 g/mol | M(calix)                               | 657.895 g/mol |
| m(NMPI)                                | 0.02507 g      | m(calix)                               | 0.00163 g     |
| c(NMPI)                                | 0.07561 mol/l  | c(calix)                               | 0.00083 mol/l |
| V( $\text{C}_2\text{D}_2\text{Cl}_4$ ) | 1.5 ml         | V( $\text{C}_2\text{D}_2\text{Cl}_4$ ) | 3 ml          |

|    | V (total) [ml] | V(addition) | V(addition) | c(NMPI) | c(calix) | n        | c(calix)/c(NMPI) | shift 1 [Hz] | shift 2 [Hz] | shift 3 [Hz] | shift 4 [Hz] | shift 5 [Hz] | shift 6 [Hz] |
|----|----------------|-------------|-------------|---------|----------|----------|------------------|--------------|--------------|--------------|--------------|--------------|--------------|
| 1  | 0.5000         | 0.0000      | 0.0000      | 0.00000 | 0.00083  | 0.00000  | 3430.01          | 2437.73      | 2268.31      | 1775.70      | 1755.74      | 1755.74      |              |
| 2  | 0.5012         | 0.0012      | 0.0012      | 0.00018 | 0.00083  | 0.21920  | 3422.57          | 2450.26      | 2267.14      | 1776.09      | 1754.57      | 1754.57      |              |
| 3  | 0.5024         | 0.0024      | 0.0012      | 0.00036 | 0.00083  | 0.43736  | 3418.27          | 2458.08      | 2264.79      | 1775.70      | 1753.00      | 1753.00      |              |
| 4  | 0.5036         | 0.0036      | 0.0012      | 0.00054 | 0.00083  | 0.65448  | 3415.14          | 2463.95      | 2264.01      | 1775.70      | 1751.83      | 1751.83      |              |
| 5  | 0.5056         | 0.0056      | 0.0020      | 0.00084 | 0.00083  | 1.01405  | 3412.40          | 2468.65      | 2264.40      | 1776.48      | 1752.22      | 1752.22      |              |
| 6  | 0.5096         | 0.0096      | 0.0040      | 0.00142 | 0.00083  | 1.72473  | 3408.10          | 2476.86      | 2262.83      | 1776.87      | 1750.66      | 1750.66      |              |
| 7  | 0.5176         | 0.0176      | 0.0080      | 0.00257 | 0.00083  | 3.11313  | 3404.18          | 2483.91      | 2262.44      | 1776.87      | 1749.87      | 1749.87      |              |
| 8  | 0.5276         | 0.0276      | 0.0100      | 0.00396 | 0.00083  | 4.78943  | 3400.66          | 2488.99      | 2262.44      | 1777.26      | 1749.09      | 1749.09      |              |
| 9  | 0.5476         | 0.0476      | 0.0200      | 0.00657 | 0.00083  | 7.95835  | 3396.36          | 2493.30      | 2262.05      | 1778.05      | 1749.87      | 1749.87      |              |
| 10 | 0.5776         | 0.0776      | 0.0300      | 0.01016 | 0.00083  | 12.30025 | 3392.84          | 2493.30      | 2262.83      | 1778.44      | 1750.66      | 1750.66      |              |
| 11 | 0.6176         | 0.1176      | 0.0400      | 0.01440 | 0.00083  | 17.43330 | 3388.92          | 2492.51      | 2263.23      | 1779.61      | 1751.44      | 1751.44      |              |
| 13 | 0.6976         | 0.1976      | 0.0800      | 0.02142 | 0.00083  | 25.93343 | 3383.84          | 2488.99      | 2265.96      | 1780.78      | 1752.61      | 1752.61      |              |
| 14 | 0.7876         | 0.2876      | 0.0900      | 0.02761 | 0.00083  | 33.43203 | 3379.92          | 2484.69      | 2267.53      | 1781.57      | 1754.57      | 1754.57      |              |
| 15 | 0.8876         | 0.3876      | 0.1000      | 0.03302 | 0.00083  | 39.98030 | 3376.40          | 2481.56      | 2269.09      | 1782.35      | 1755.74      | 1755.74      |              |
| 16 | 1.0876         | 0.5876      | 0.2000      | 0.04085 | 0.00083  | 49.46433 | 3371.32          | 2476.47      | 2271.44      | 1783.91      | 1757.31      | 1757.31      |              |

K11 12.99  $\text{M}^{-1}$   
 Error 0.234093  $\text{M}^{-1}$   
  
 K21 2798.4  $\text{M}^{-1}$   
 Error 38.86978  $\text{M}^{-1}$

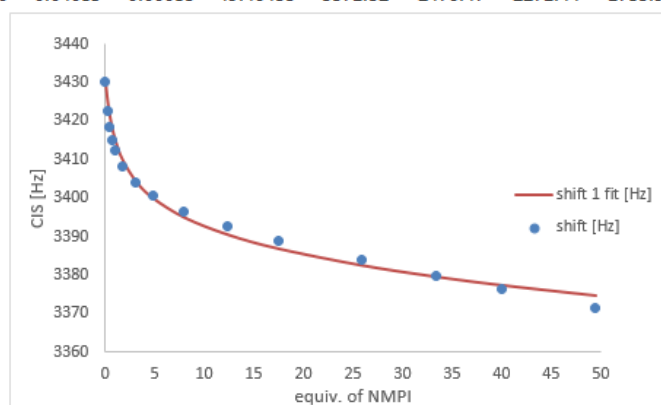

**Figure S38:**  $^1\text{H}$  NMR titration of compound **4a** with NMPI ( $\text{CDCl}_3$ , 400 MHz).

Calixarene **4a** was dissolved in a specified amount of  $C_2D_2Cl_4$ . 0.5 ml of calixarene solution was put in an NMR tube. To the calixarene solution (0.6 ml), a specific amount of *N*-methylquinolinium iodide (NMQI) was added. The aliquots of NMQI were gradually added to the NMR tube to achieve different calixarene/guest ratios (1:0.000-52.044), ensuring constant host concentration during the experiment. The complexation constant was determined by analyzing CIS of host protons using nonlinear curve-fitting procedure (program BindFit).

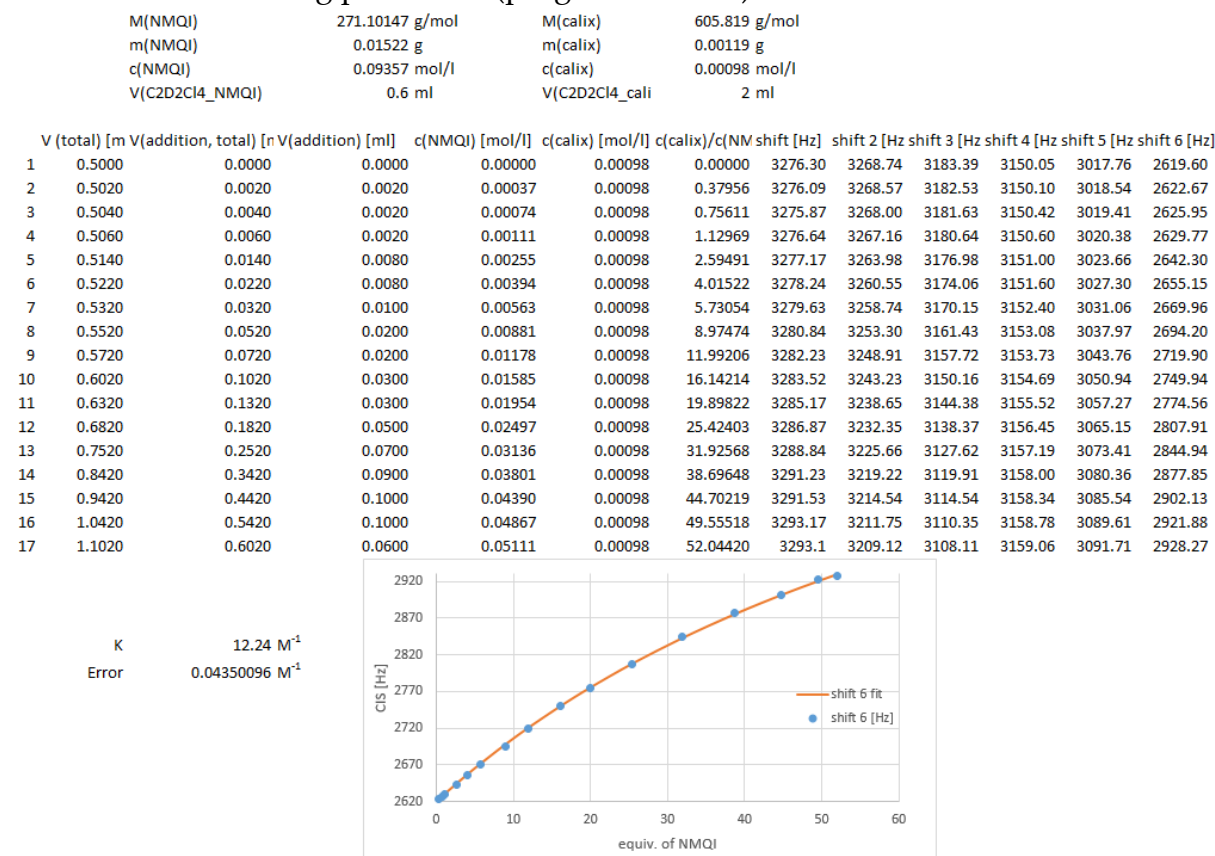

**Figure S39:**  $^1H$  NMR titration of compound **4a** with NMQI ( $C_2D_2Cl_4$ , 400 MHz).

Calixarene **4a** was dissolved in a specified amount of  $C_2D_2Cl_4$ . 0.5 ml of calixarene solution was put in an NMR tube. To the calixarene solution (0.6 ml), a specific amount of *N*-methyloquinolinium iodide (NMII) was added. The aliquots of NMII were gradually added to the NMR tube to achieve different calixarene/guest ratios (1:0.000-50.121), ensuring constant host concentration during the experiment. The complexation constant was determined by analyzing CIS of host protons using nonlinear curve-fitting procedure (program BindFit).

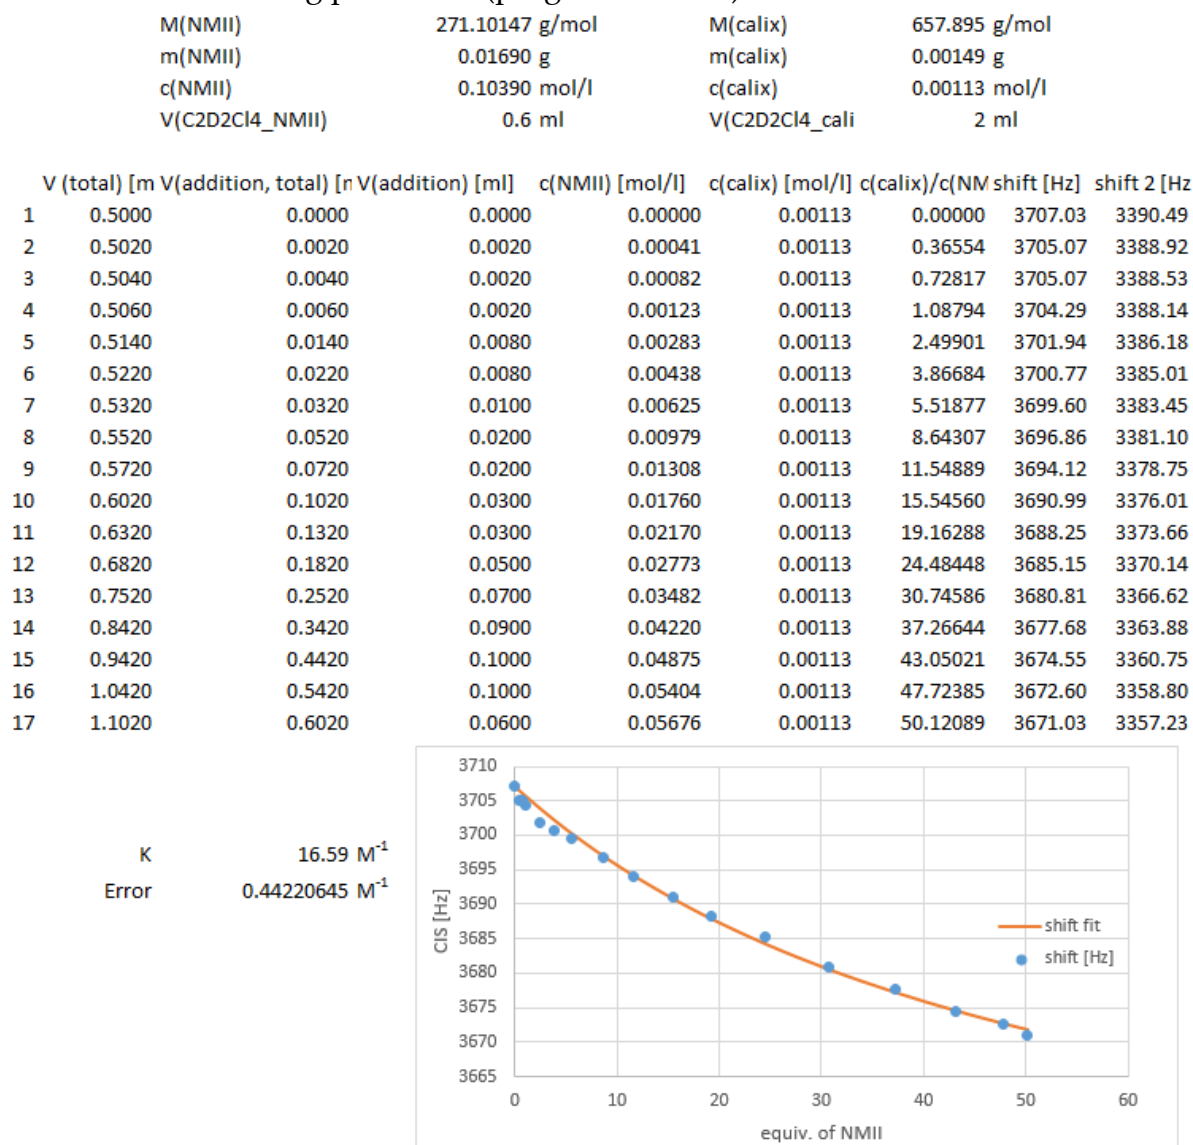

**Figure S40:**  $^1H$  NMR titration of compound **4a** with NMII ( $C_2D_2Cl_4$ , 400 MHz).

Calixarene **6a\_1** was dissolved in a specified amount of C<sub>2</sub>D<sub>2</sub>Cl<sub>4</sub>. 0.5 ml of calixarene solution was put in an NMR tube. To the calixarene solution (0.6 ml), a specific amount of (*S*)-*N*-methylnicotinium iodide (NMNI) was added. The aliquots of NMNI were gradually added to the NMR tube to achieve different calixarene/guest ratios (1:0.000-51.573), ensuring constant host concentration during the experiment. The complexation constant was determined by analyzing CIS of host protons using nonlinear curve-fitting procedure (program BindFit).

|                                                        |                 |                                                        |               |
|--------------------------------------------------------|-----------------|--------------------------------------------------------|---------------|
| M(NMNI)                                                | 304.17547 g/mol | M(calix)                                               | 657.895 g/mol |
| m(NMNI)                                                | 0.01896 g       | m(calix)                                               | 0.00133 g     |
| c(NMNI)                                                | 0.10389 mol/l   | c(calix)                                               | 0.00101 mol/l |
| V(C <sub>2</sub> D <sub>2</sub> Cl <sub>4</sub> _NMNI) | 0.6 ml          | V(C <sub>2</sub> D <sub>2</sub> Cl <sub>4</sub> _cali) | 2 ml          |

  

|    | V (total) [ml] | V(addition, total) [ml] | V(addition) [ml] | c(NMNI) [mol/l] | c(calix) [mol/l] | c(calix)/c(NMNI) | shift [Hz] |
|----|----------------|-------------------------|------------------|-----------------|------------------|------------------|------------|
| 1  | 0.5000         | 0.0000                  | 0.0000           | 0.00000         | 0.00101          | 0.00000          | 3422.73    |
| 2  | 0.5006         | 0.0006                  | 0.0006           | 0.00012         | 0.00101          | 0.12319          | 3422.22    |
| 3  | 0.5012         | 0.0012                  | 0.0006           | 0.00025         | 0.00101          | 0.24608          | 3421.30    |
| 4  | 0.5020         | 0.0020                  | 0.0008           | 0.00041         | 0.00101          | 0.40947          | 3421.13    |
| 5  | 0.5028         | 0.0028                  | 0.0008           | 0.00058         | 0.00101          | 0.57235          | 3420.91    |
| 6  | 0.5042         | 0.0042                  | 0.0014           | 0.00087         | 0.00101          | 0.85614          | 3420.91    |
| 7  | 0.5056         | 0.0056                  | 0.0014           | 0.00115         | 0.00101          | 1.13836          | 3420.13    |
| 8  | 0.5136         | 0.0136                  | 0.0080           | 0.00275         | 0.00101          | 2.72152          | 3418.90    |
| 9  | 0.5236         | 0.0236                  | 0.0100           | 0.00468         | 0.00101          | 4.63244          | 3417.88    |
| 10 | 0.5536         | 0.0536                  | 0.0300           | 0.01006         | 0.00101          | 9.95100          | 3413.15    |
| 11 | 0.5936         | 0.0936                  | 0.0400           | 0.01638         | 0.00101          | 16.20615         | 3409.22    |
| 12 | 0.6436         | 0.1436                  | 0.0500           | 0.02318         | 0.00101          | 22.93170         | 3406.23    |
| 13 | 0.7136         | 0.2136                  | 0.0700           | 0.03110         | 0.00101          | 30.76410         | 3403.47    |
| 14 | 0.8036         | 0.3036                  | 0.0900           | 0.03925         | 0.00101          | 38.82931         | 3401.27    |
| 15 | 0.9036         | 0.4036                  | 0.1000           | 0.04640         | 0.00101          | 45.90635         | 3399.54    |
| 16 | 1.0036         | 0.5036                  | 0.1000           | 0.05213         | 0.00101          | 51.57306         | 3398.51    |

K                    37.26 M<sup>-1</sup>  
 Error                2.3943276 M<sup>-1</sup>

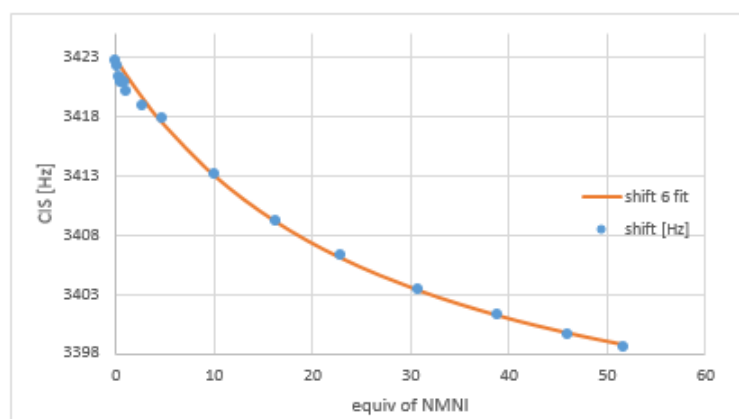

**Figure S41:** <sup>1</sup>H NMR titration of compound **6a\_1** with NMNI (C<sub>2</sub>D<sub>2</sub>Cl<sub>4</sub>, 400 MHz).

Calixarene **6a\_2** was dissolved in a specified amount of C<sub>2</sub>D<sub>2</sub>Cl<sub>4</sub>. 0.5 ml of calixarene solution was put in an NMR tube. To the calixarene solution (0.6 ml), a specific amount of (*S*)-*N*-methylnicotinium iodide (NMNI) was added. The aliquots of NMNI were gradually added to the NMR tube to achieve different calixarene/guest ratios (1:0.000-50.221), ensuring constant host concentration during the experiment. The complexation constant was determined by analyzing CIS of host protons using nonlinear curve-fitting procedure (program BindFit).

|                                                        |                 |                                                        |               |
|--------------------------------------------------------|-----------------|--------------------------------------------------------|---------------|
| M(NMNI)                                                | 304.17547 g/mol | M(calix)                                               | 657.895 g/mol |
| m(NMNI)                                                | 0.01999 g       | m(calix)                                               | 0.00144 g     |
| c(NMNI)                                                | 0.10953 mol/l   | c(calix)                                               | 0.00109 mol/l |
| V(C <sub>2</sub> D <sub>2</sub> Cl <sub>4</sub> _NMNI) | 0.6 ml          | V(C <sub>2</sub> D <sub>2</sub> Cl <sub>4</sub> _cali) | 2 ml          |

  

|    | V (total) [ml] | V(addition, total) [ml] | V(addition) [ml] | c(NMNI) [mol/l] | c(calix) [mol/l] | c(calix)/c(NMNI) | shift [Hz] |
|----|----------------|-------------------------|------------------|-----------------|------------------|------------------|------------|
| 1  | 0.5000         | 0.0000                  | 0.0000           | 0.00000         | 0.00109          | 0.00000          | 3446.37    |
| 2  | 0.5006         | 0.0006                  | 0.0006           | 0.00013         | 0.00109          | 0.11996          | 3445.88    |
| 3  | 0.5012         | 0.0012                  | 0.0006           | 0.00026         | 0.00109          | 0.23962          | 3444.74    |
| 4  | 0.5020         | 0.0020                  | 0.0008           | 0.00044         | 0.00109          | 0.39874          | 3443.76    |
| 5  | 0.5028         | 0.0028                  | 0.0008           | 0.00061         | 0.00109          | 0.55735          | 3444.29    |
| 6  | 0.5042         | 0.0042                  | 0.0014           | 0.00091         | 0.00109          | 0.83370          | 3443.76    |
| 7  | 0.5056         | 0.0056                  | 0.0014           | 0.00121         | 0.00109          | 1.10852          | 3442.82    |
| 8  | 0.5136         | 0.0136                  | 0.0080           | 0.00290         | 0.00109          | 2.65018          | 3436.86    |
| 9  | 0.5236         | 0.0236                  | 0.0100           | 0.00494         | 0.00109          | 4.51101          | 3430.45    |
| 10 | 0.5536         | 0.0536                  | 0.0300           | 0.01060         | 0.00109          | 9.69014          | 3421.52    |
| 11 | 0.5936         | 0.0936                  | 0.0400           | 0.01727         | 0.00109          | 15.78132         | 3415.10    |
| 12 | 0.6436         | 0.1436                  | 0.0500           | 0.02444         | 0.00109          | 22.33057         | 3410.25    |
| 13 | 0.7136         | 0.2136                  | 0.0700           | 0.03279         | 0.00109          | 29.95766         | 3406.33    |
| 14 | 0.8036         | 0.3036                  | 0.0900           | 0.04138         | 0.00109          | 37.81145         | 3403.36    |
| 15 | 0.9036         | 0.4036                  | 0.1000           | 0.04892         | 0.00109          | 44.70297         | 3400.85    |
| 16 | 1.0036         | 0.5036                  | 0.1000           | 0.05496         | 0.00109          | 50.22113         | 3399.44    |

K                    72.09 M<sup>-1</sup>  
 Error                2.97126144 M<sup>-1</sup>

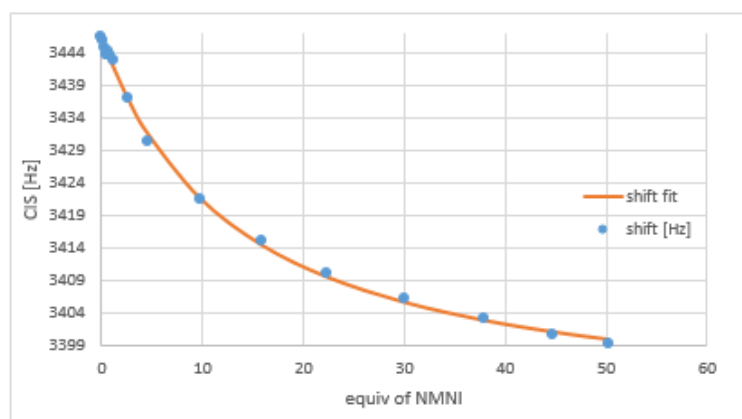

**Figure S42:** <sup>1</sup>H NMR titration of compound **6a\_2** with NMNI (C<sub>2</sub>D<sub>2</sub>Cl<sub>4</sub>, 400 MHz).

Calixarene **16** was dissolved in a specified amount of  $\text{CDCl}_3$ . 0.5 ml of calixarene solution was put in an NMR tube. To the calixarene solution (0.6 ml), a specific amount of tetrabutylammonium benzoate (TBA-benzoate) was added. The aliquots of TBA-benzoate were gradually added to the NMR tube to achieve different calixarene/guest ratios (1:0.000-49.811), ensuring constant host concentration during the experiment. The complexation constant was determined by analyzing CIS of host protons using nonlinear curve-fitting procedure (program BindFit).

|                                |               |                            |               |
|--------------------------------|---------------|----------------------------|---------------|
| M(TBA-benzoate)                | 363.58 g/mol  | M(calix)                   | 768.918 g/mol |
| m(TBA-benzoate)                | 0.02544 g     | m(calix)                   | 0.00271 g     |
| c(TBA-benzoate)                | 0.11662 mol/l | c(calix)                   | 0.00117 mol/l |
| V( $\text{CDCl}_3$ _TBA-benzo) | 0.6 ml        | V( $\text{CDCl}_3$ _calix) | 3 ml          |

  

|    | V (total) [ml] | V(addition, total) [ml] | [r V(addition) [ml] | c(TBA-benzoate) [mol/l] | c(calix) [mol/l] | c(calix)/c(TBA) | shift [Hz] |
|----|----------------|-------------------------|---------------------|-------------------------|------------------|-----------------|------------|
| 1  | 0.5000         | 0.0000                  | 0.0000              | 0.00000                 | 0.00117          | 0.00000         | 2825.01    |
| 2  | 0.5006         | 0.0006                  | 0.0006              | 0.00014                 | 0.00117          | 0.11898         | 2825.96    |
| 3  | 0.5012         | 0.0012                  | 0.0006              | 0.00028                 | 0.00117          | 0.23767         | 2827.33    |
| 4  | 0.5020         | 0.0020                  | 0.0008              | 0.00046                 | 0.00117          | 0.39548         | 2830.75    |
| 5  | 0.5028         | 0.0028                  | 0.0008              | 0.00065                 | 0.00117          | 0.55279         | 2831.14    |
| 6  | 0.5042         | 0.0042                  | 0.0014              | 0.00097                 | 0.00117          | 0.82688         | 2832.12    |
| 7  | 0.5056         | 0.0056                  | 0.0014              | 0.00129                 | 0.00117          | 1.09946         | 2833.68    |
| 8  | 0.5136         | 0.0136                  | 0.0080              | 0.00309                 | 0.00117          | 2.62852         | 2841.21    |
| 9  | 0.5236         | 0.0236                  | 0.0100              | 0.00526                 | 0.00117          | 4.47415         | 2852.36    |
| 10 | 0.5536         | 0.0536                  | 0.0300              | 0.01129                 | 0.00117          | 9.61096         | 2872.61    |
| 11 | 0.5936         | 0.0936                  | 0.0400              | 0.01839                 | 0.00117          | 15.65236        | 2891.88    |
| 12 | 0.6436         | 0.1436                  | 0.0500              | 0.02602                 | 0.00117          | 22.14809        | 2911.64    |
| 13 | 0.7136         | 0.2136                  | 0.0700              | 0.03491                 | 0.00117          | 29.71285        | 2923.57    |
| 14 | 0.8036         | 0.3036                  | 0.0900              | 0.04406                 | 0.00117          | 37.50246        | 2936.87    |
| 15 | 0.9036         | 0.4036                  | 0.1000              | 0.05209                 | 0.00117          | 44.33766        | 2943.62    |
| 16 | 1.0036         | 0.5036                  | 0.1000              | 0.05852                 | 0.00117          | 49.81073        | 2950.18    |

K                       $29.87 \text{ M}^{-1}$   
 Error                   $0.83113275 \text{ M}^{-1}$

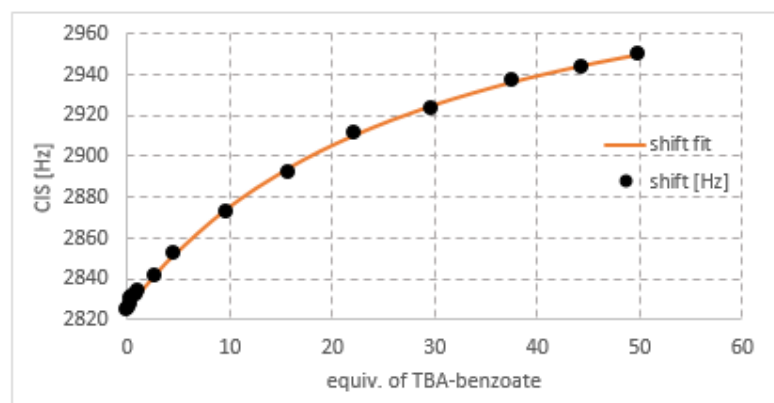

Figure S43:  $^1\text{H}$  NMR titration of compound **16** with TBA benzoate ( $\text{CDCl}_3$ , 400 MHz).

Calixarene **16** was dissolved in a specified amount of  $\text{CDCl}_3$ . 0.5 ml of calixarene solution was put in an NMR tube. To the calixarene solution (0.6 ml), a specific amount of tetrabutylammonium acetate (TBA-acetate) was added. The aliquots of TBA-acetate were gradually added to the NMR tube to achieve different calixarene/guest ratios (1:0.000-48.590), ensuring constant host concentration during the experiment. The complexation constant was determined by analyzing CIS of host protons using nonlinear curve-fitting procedure (program BindFit).

|                                |               |                            |               |
|--------------------------------|---------------|----------------------------|---------------|
| M(TBA-acetate)                 | 242.47 g/mol  | M(calix)                   | 768.918 g/mol |
| m(TBA-acetate)                 | 0.01655 g     | m(calix)                   | 0.00271 g     |
| c(TBA-acetate)                 | 0.11376 mol/l | c(calix)                   | 0.00117 mol/l |
| V( $\text{CDCl}_3$ _TBA-acetat | 0.6 ml        | V( $\text{CDCl}_3$ _calix) | 3 ml          |

  

|    | V (total) [ml] | V(addition, total) [ml] | r V(addition) [ml] | c(TBA-acetate) | r c(calix) [mol/l] | c(calix)/c(TBA | shift [Hz] |
|----|----------------|-------------------------|--------------------|----------------|--------------------|----------------|------------|
| 1  | 0.5000         | 0.0000                  | 0.0000             | 0.00000        | 0.00117            | 0.00000        | 2825.63    |
| 2  | 0.5006         | 0.0006                  | 0.0006             | 0.00014        | 0.00117            | 0.11606        | 2826.16    |
| 3  | 0.5012         | 0.0012                  | 0.0006             | 0.00027        | 0.00117            | 0.23184        | 2826.33    |
| 4  | 0.5020         | 0.0020                  | 0.0008             | 0.00045        | 0.00117            | 0.38579        | 2830.64    |
| 5  | 0.5028         | 0.0028                  | 0.0008             | 0.00063        | 0.00117            | 0.53924        | 2830.84    |
| 6  | 0.5042         | 0.0042                  | 0.0014             | 0.00095        | 0.00117            | 0.80662        | 2831.53    |
| 7  | 0.5056         | 0.0056                  | 0.0014             | 0.00126        | 0.00117            | 1.07251        | 2832.60    |
| 8  | 0.5136         | 0.0136                  | 0.0080             | 0.00301        | 0.00117            | 2.56410        | 2839.55    |
| 9  | 0.5236         | 0.0236                  | 0.0100             | 0.00513        | 0.00117            | 4.36449        | 2848.55    |
| 10 | 0.5536         | 0.0536                  | 0.0300             | 0.01101        | 0.00117            | 9.37539        | 2869.77    |
| 11 | 0.5936         | 0.0936                  | 0.0400             | 0.01794        | 0.00117            | 15.26872       | 2889.34    |
| 12 | 0.6436         | 0.1436                  | 0.0500             | 0.02538        | 0.00117            | 21.60524       | 2906.06    |
| 13 | 0.7136         | 0.2136                  | 0.0700             | 0.03405        | 0.00117            | 28.98459       | 2922.20    |
| 14 | 0.8036         | 0.3036                  | 0.0900             | 0.04298        | 0.00117            | 36.58327       | 2934.82    |
| 15 | 0.9036         | 0.4036                  | 0.1000             | 0.05081        | 0.00117            | 43.25095       | 2943.82    |
| 16 | 1.0036         | 0.5036                  | 0.1000             | 0.05708        | 0.00117            | 48.58988       | 2950.18    |

K                    23.64  $\text{M}^{-1}$   
 Error                0.408381  $\text{M}^{-1}$

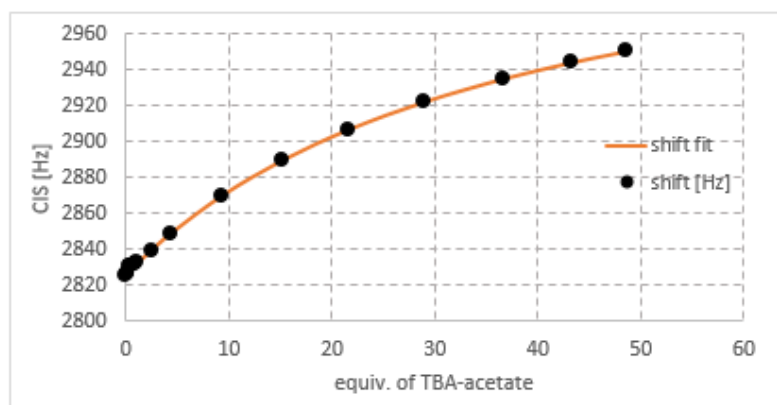

**Figure S44:**  $^1\text{H}$  NMR titration of compound **16** with TBA acetate ( $\text{CDCl}_3$ , 400 MHz).

## 5. VT $^1\text{H}$ NMR experiments

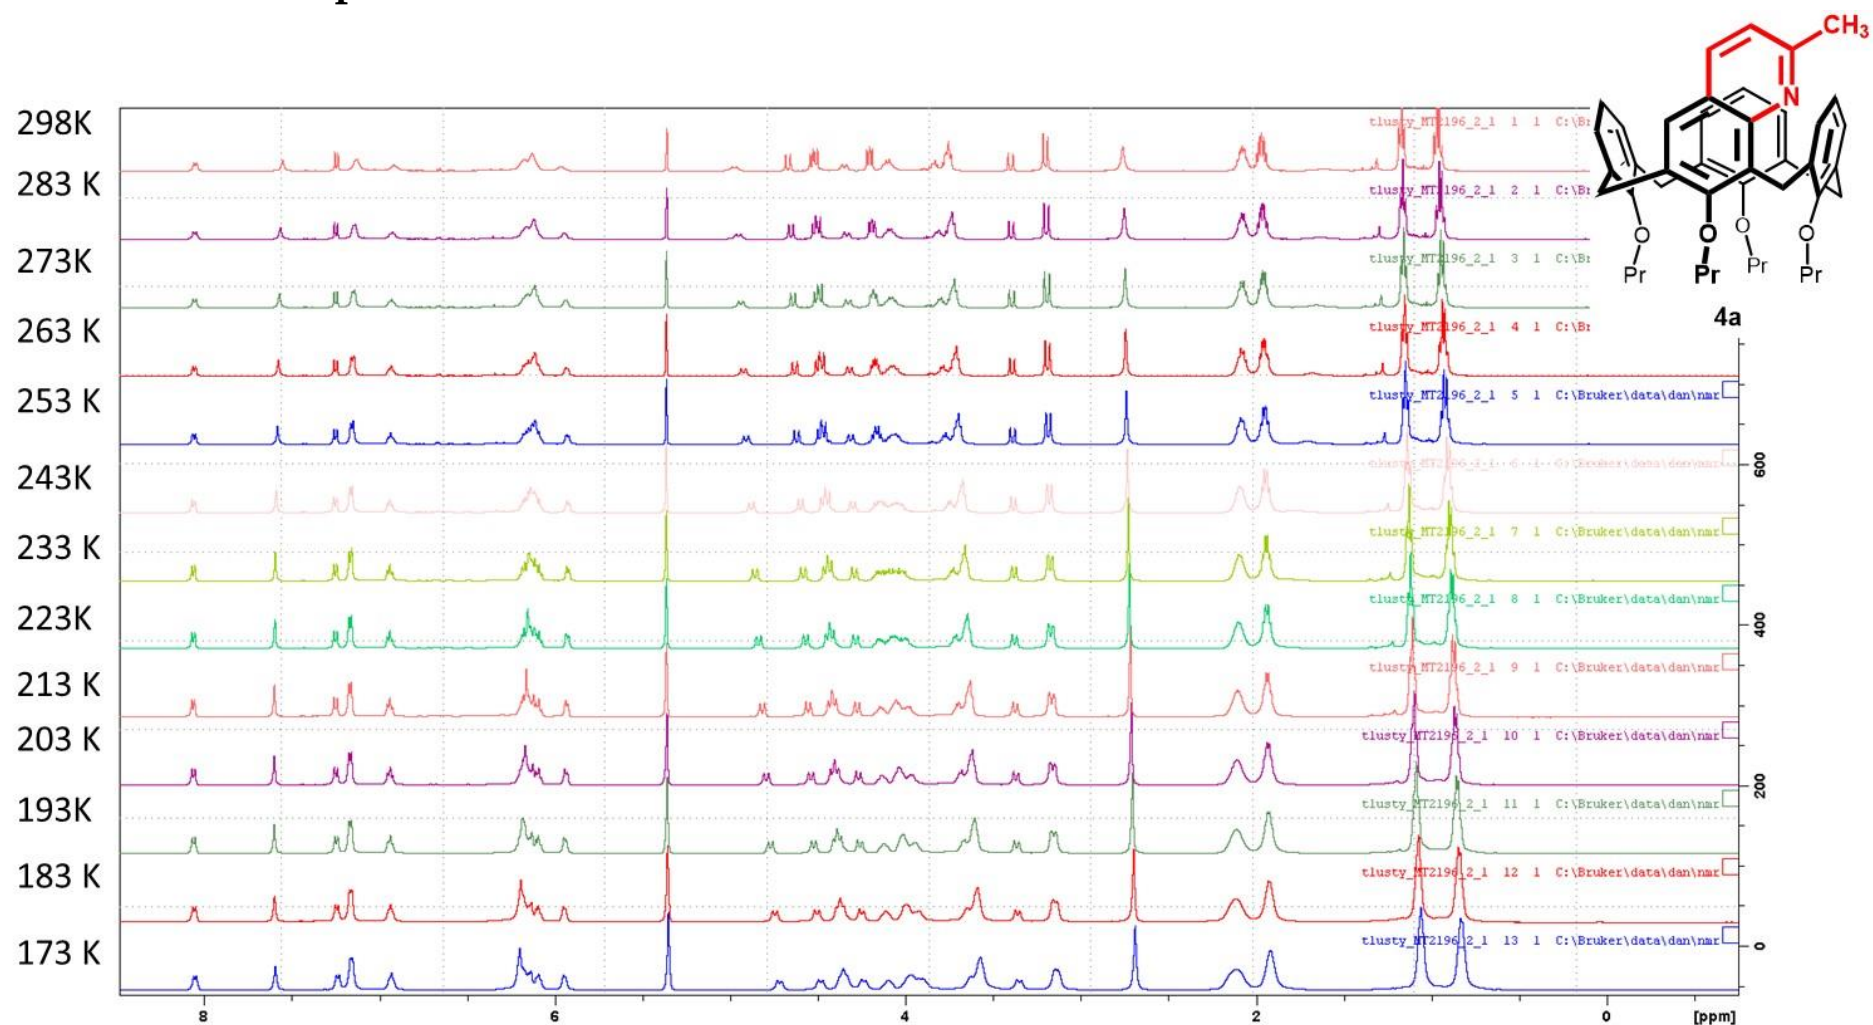

**Figure S45:** Variable temperature  $^1\text{H}$  NMR spectra of compound **4a** ( $\text{CD}_2\text{Cl}_2$ , 500 MHz).

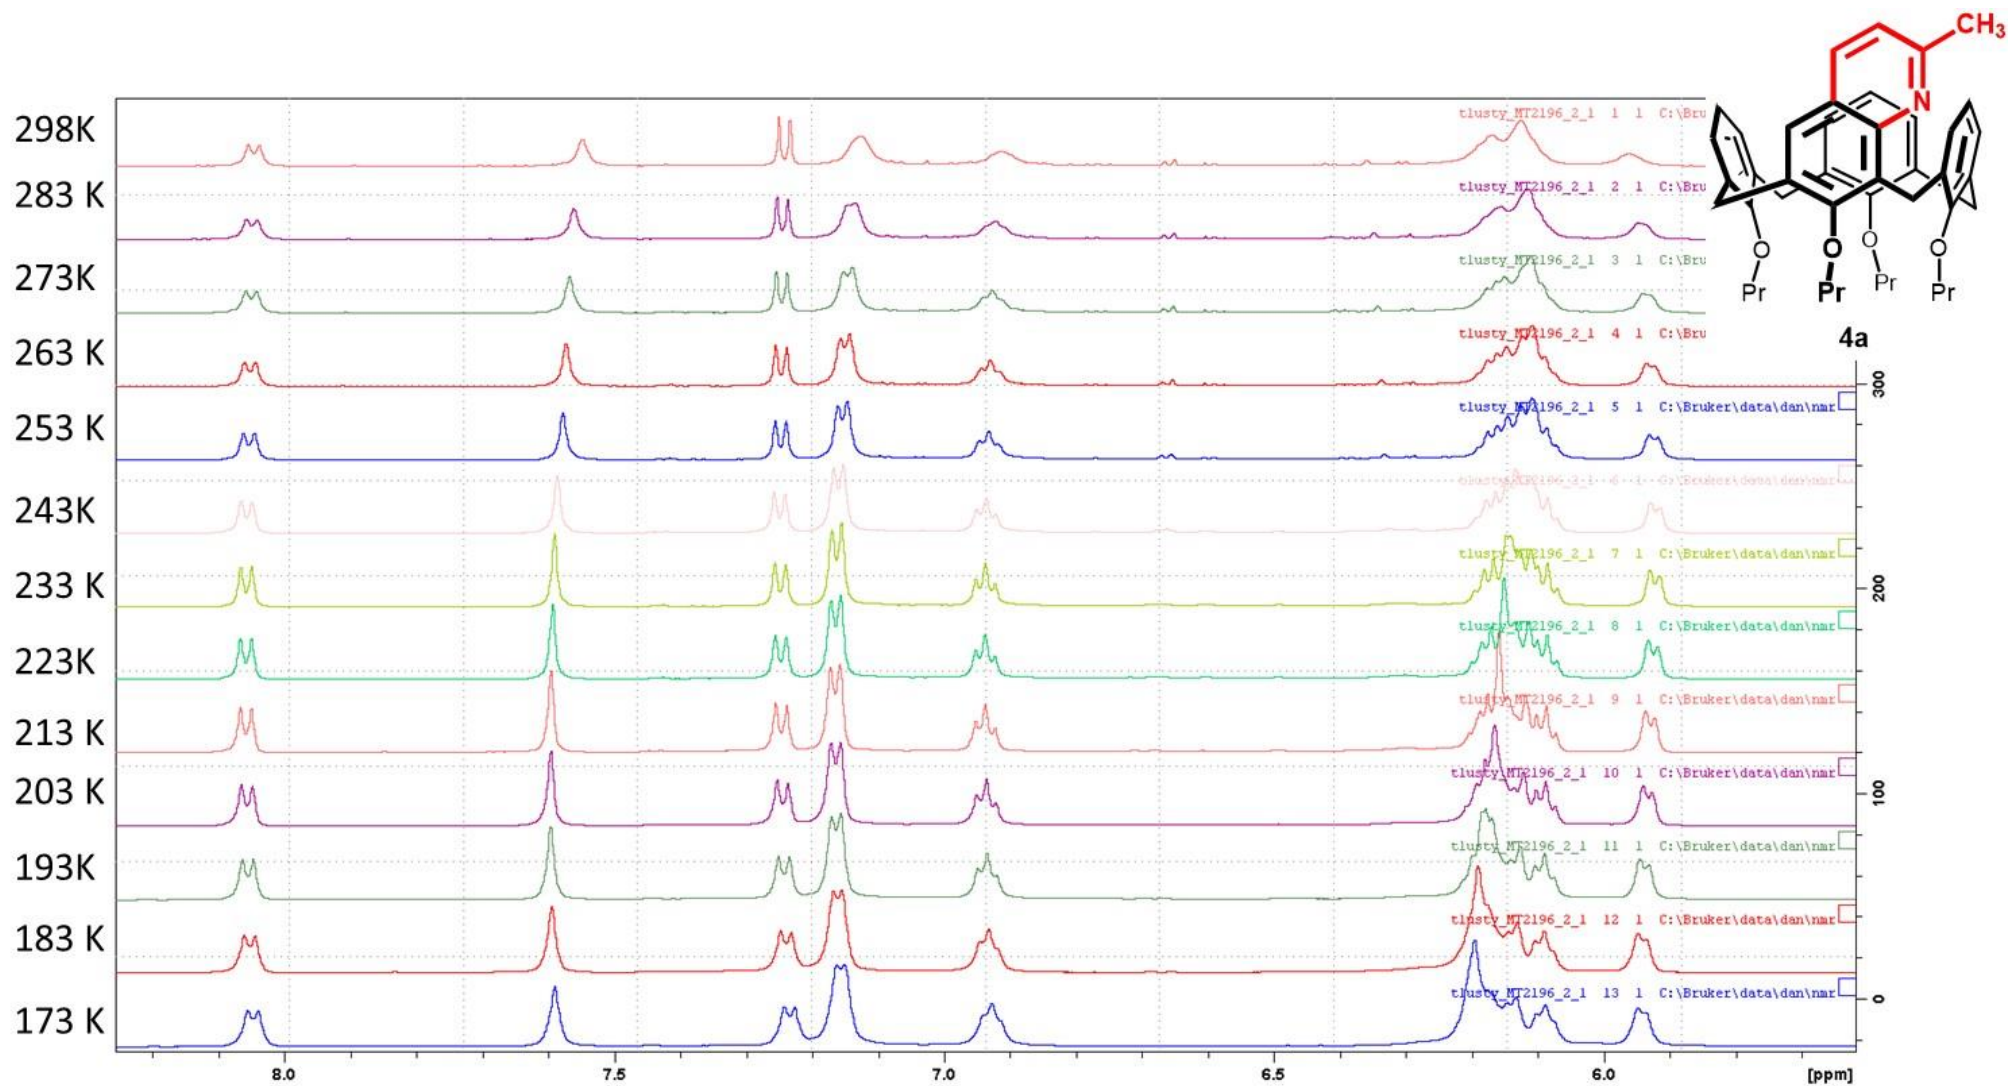

**Figure S46:** Variable temperature <sup>1</sup>H NMR spectra of compound **4a** (CD<sub>2</sub>Cl<sub>2</sub>, 500 MHz) – aromatic signals region.

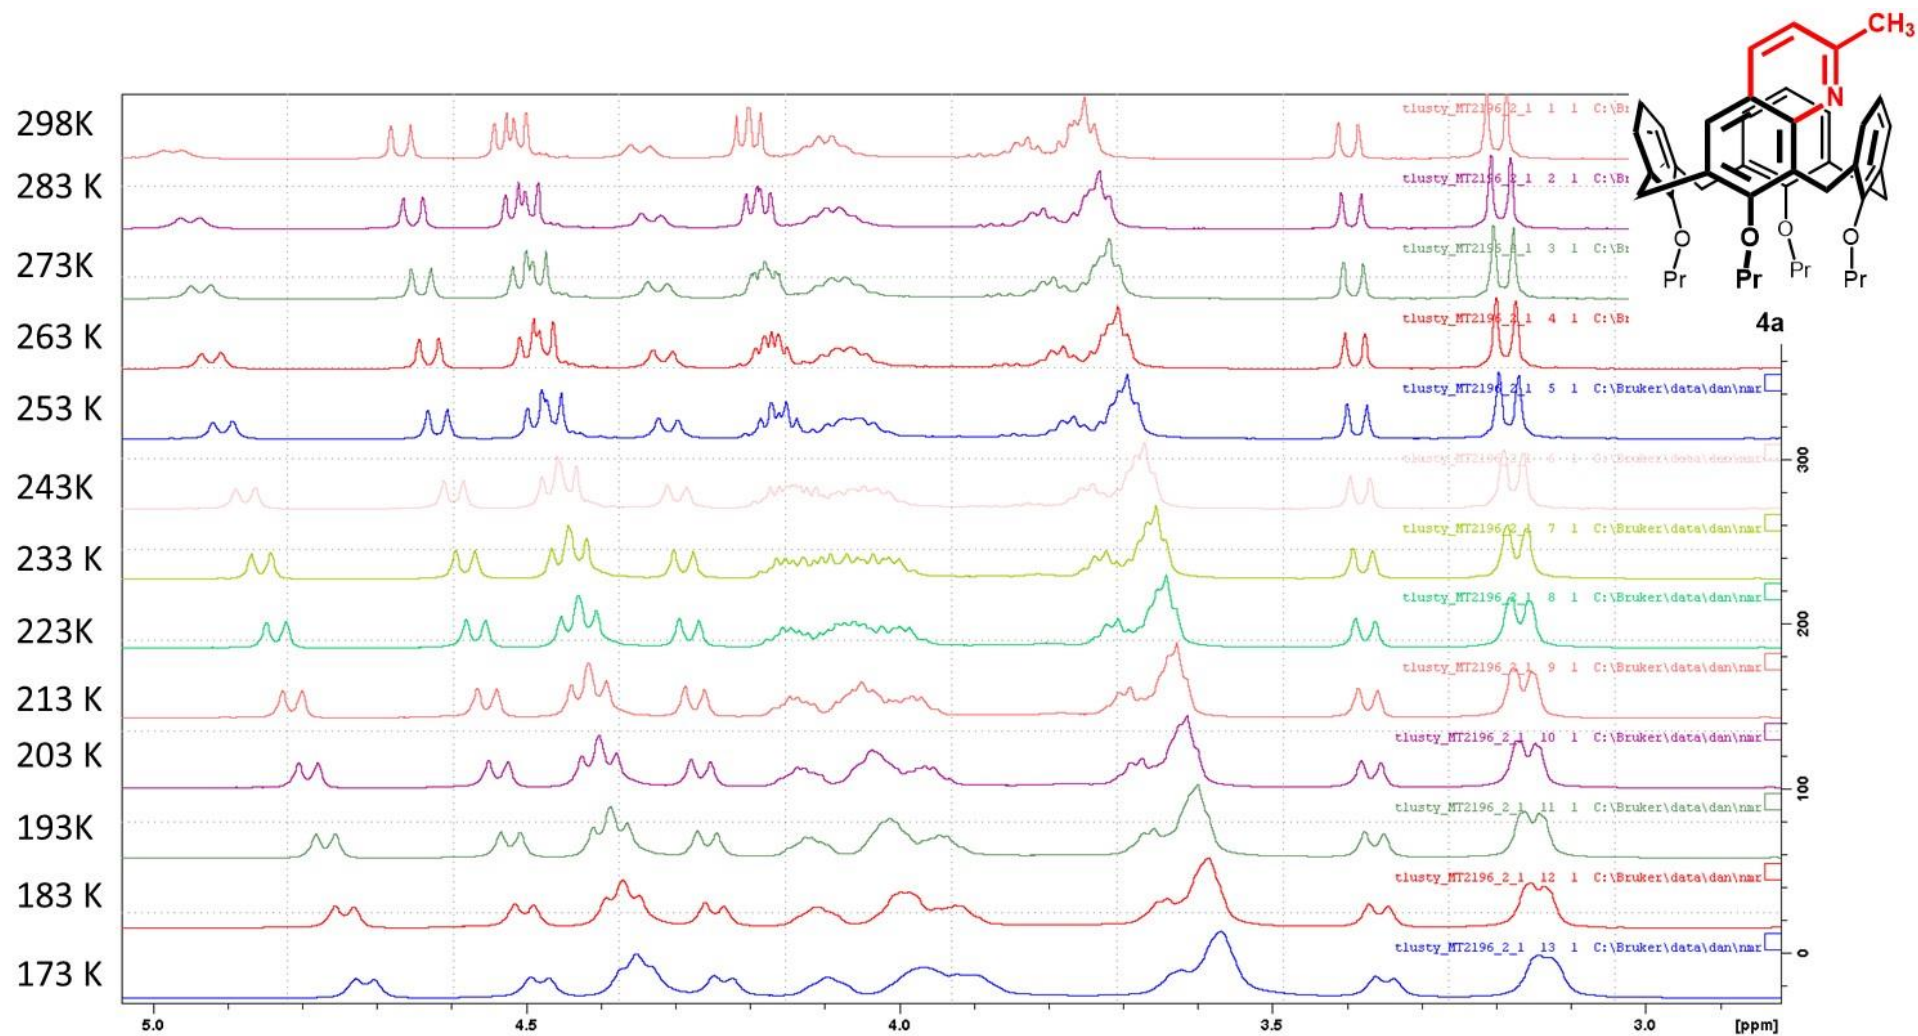

**Figure S47:** Variable temperature  $^1\text{H}$  NMR spectra of compound **4a** ( $\text{CD}_2\text{Cl}_2$ , 500 MHz) –  $\text{CH}_2$  signals region.

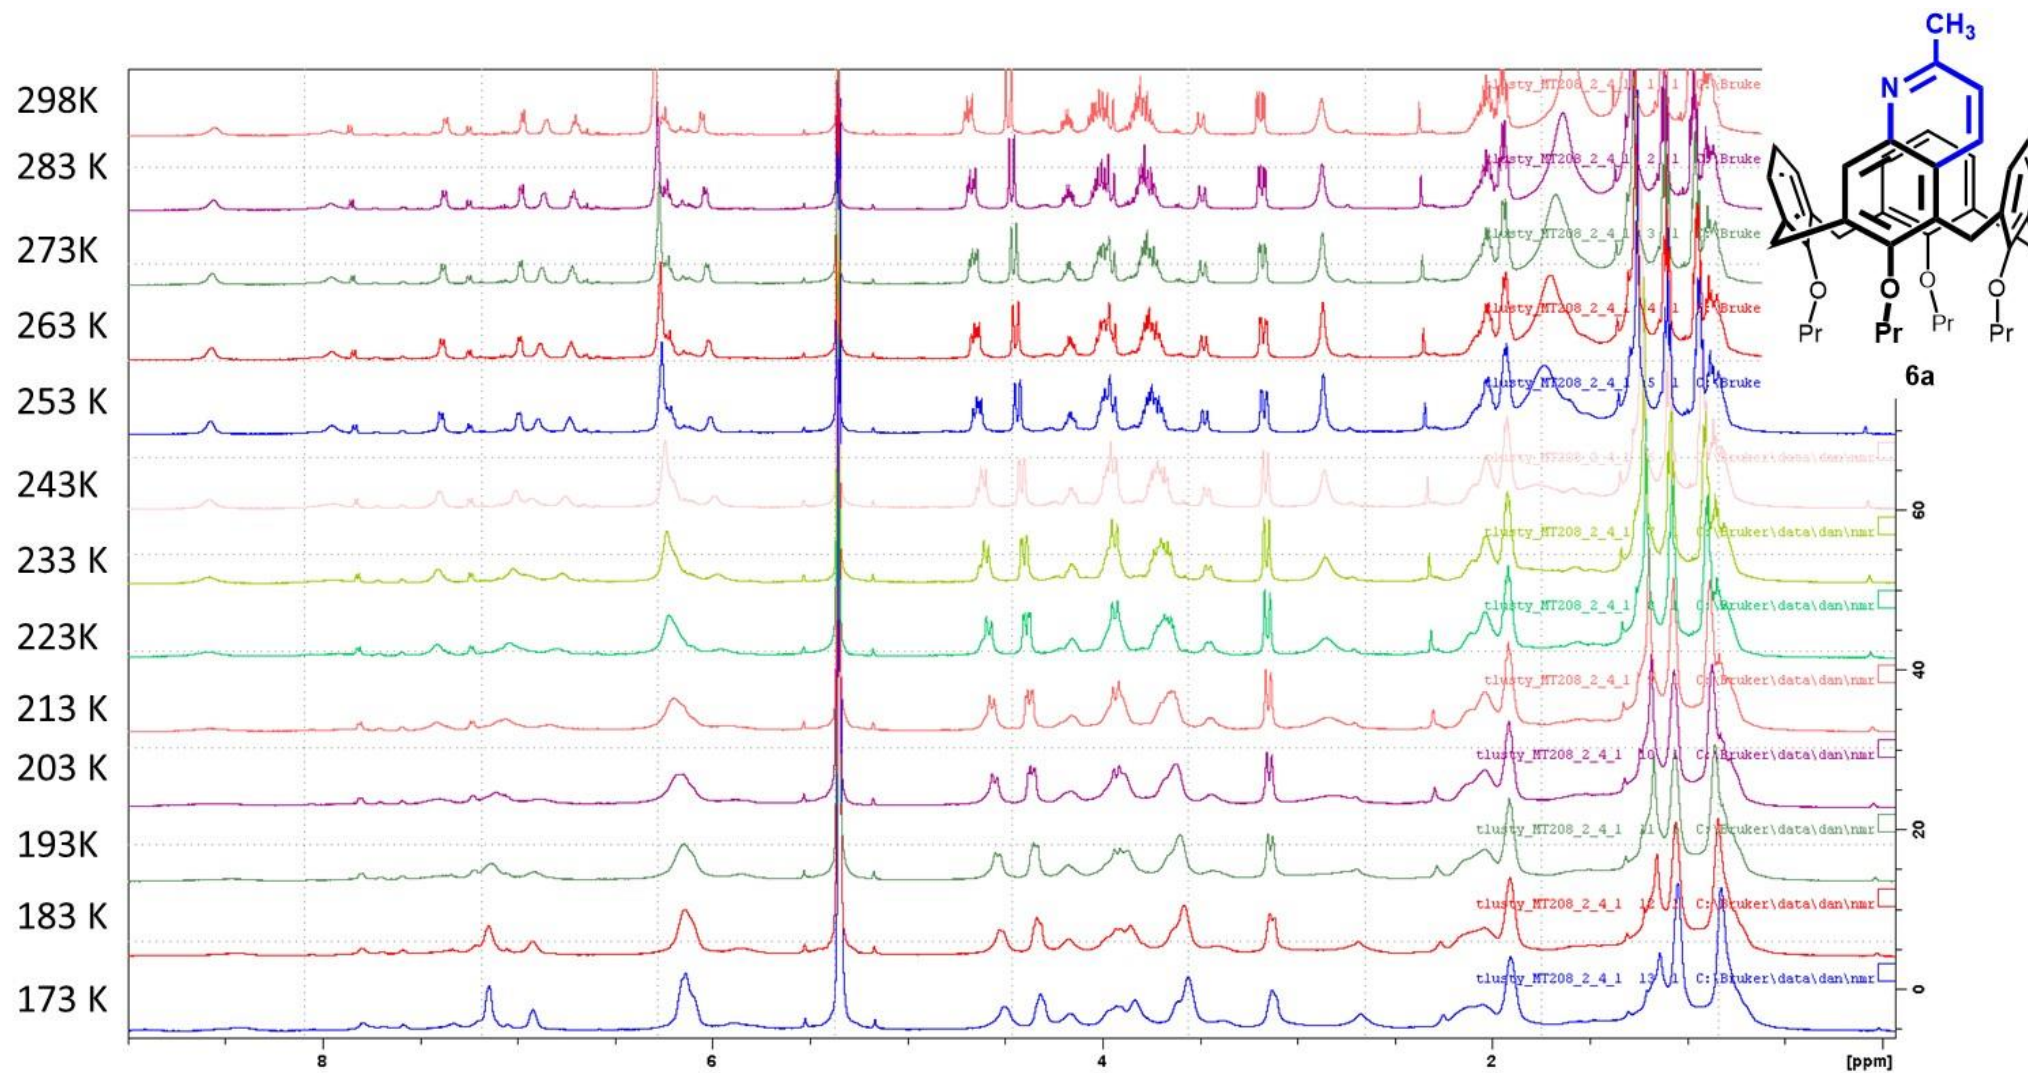

Figure S48: Variable temperature  $^1\text{H}$  NMR spectra of compound **6a** ( $\text{CD}_2\text{Cl}_2$ , 500 MHz).

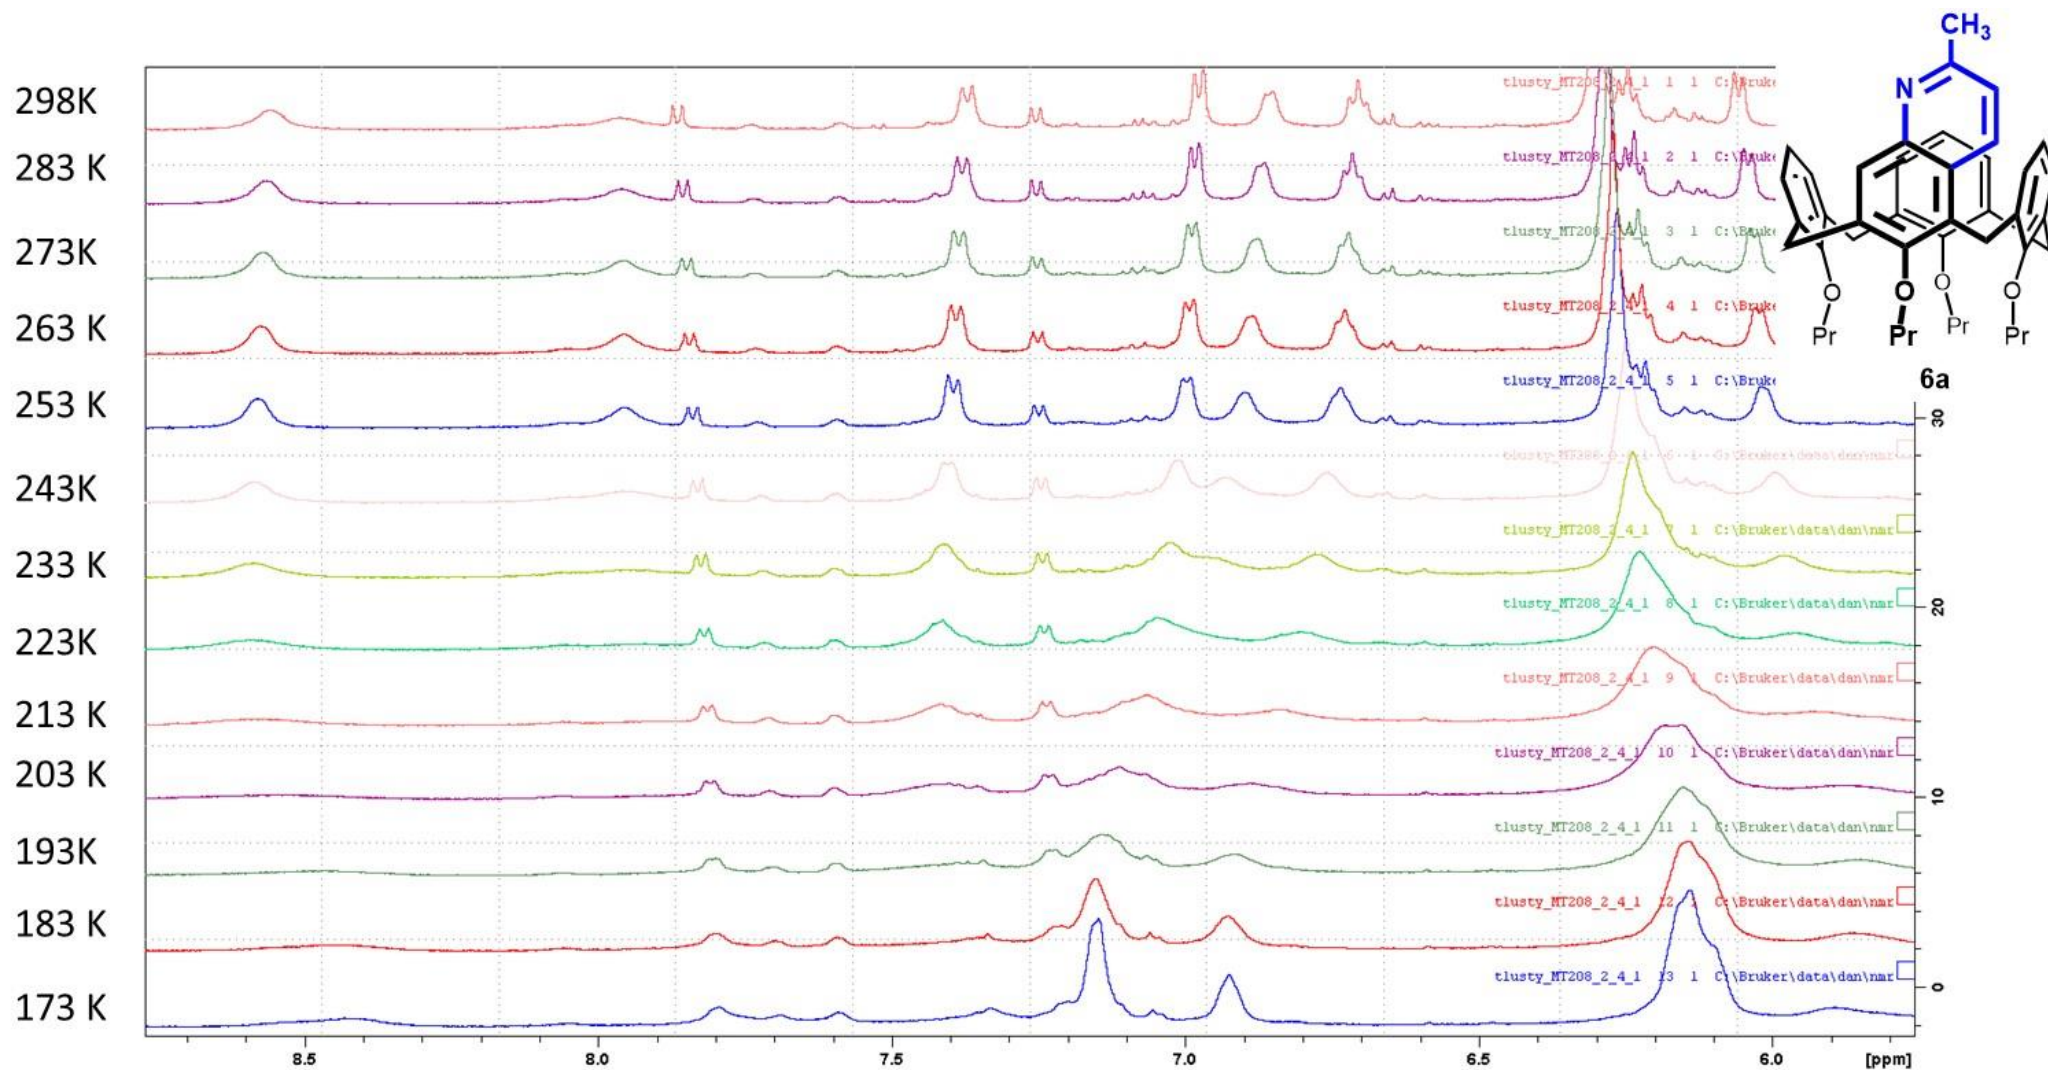

**Figure S49:** Variable temperature  $^1\text{H}$  NMR spectra of compound **6a** ( $\text{CD}_2\text{Cl}_2$ , 500 MHz) – aromatic signals region.

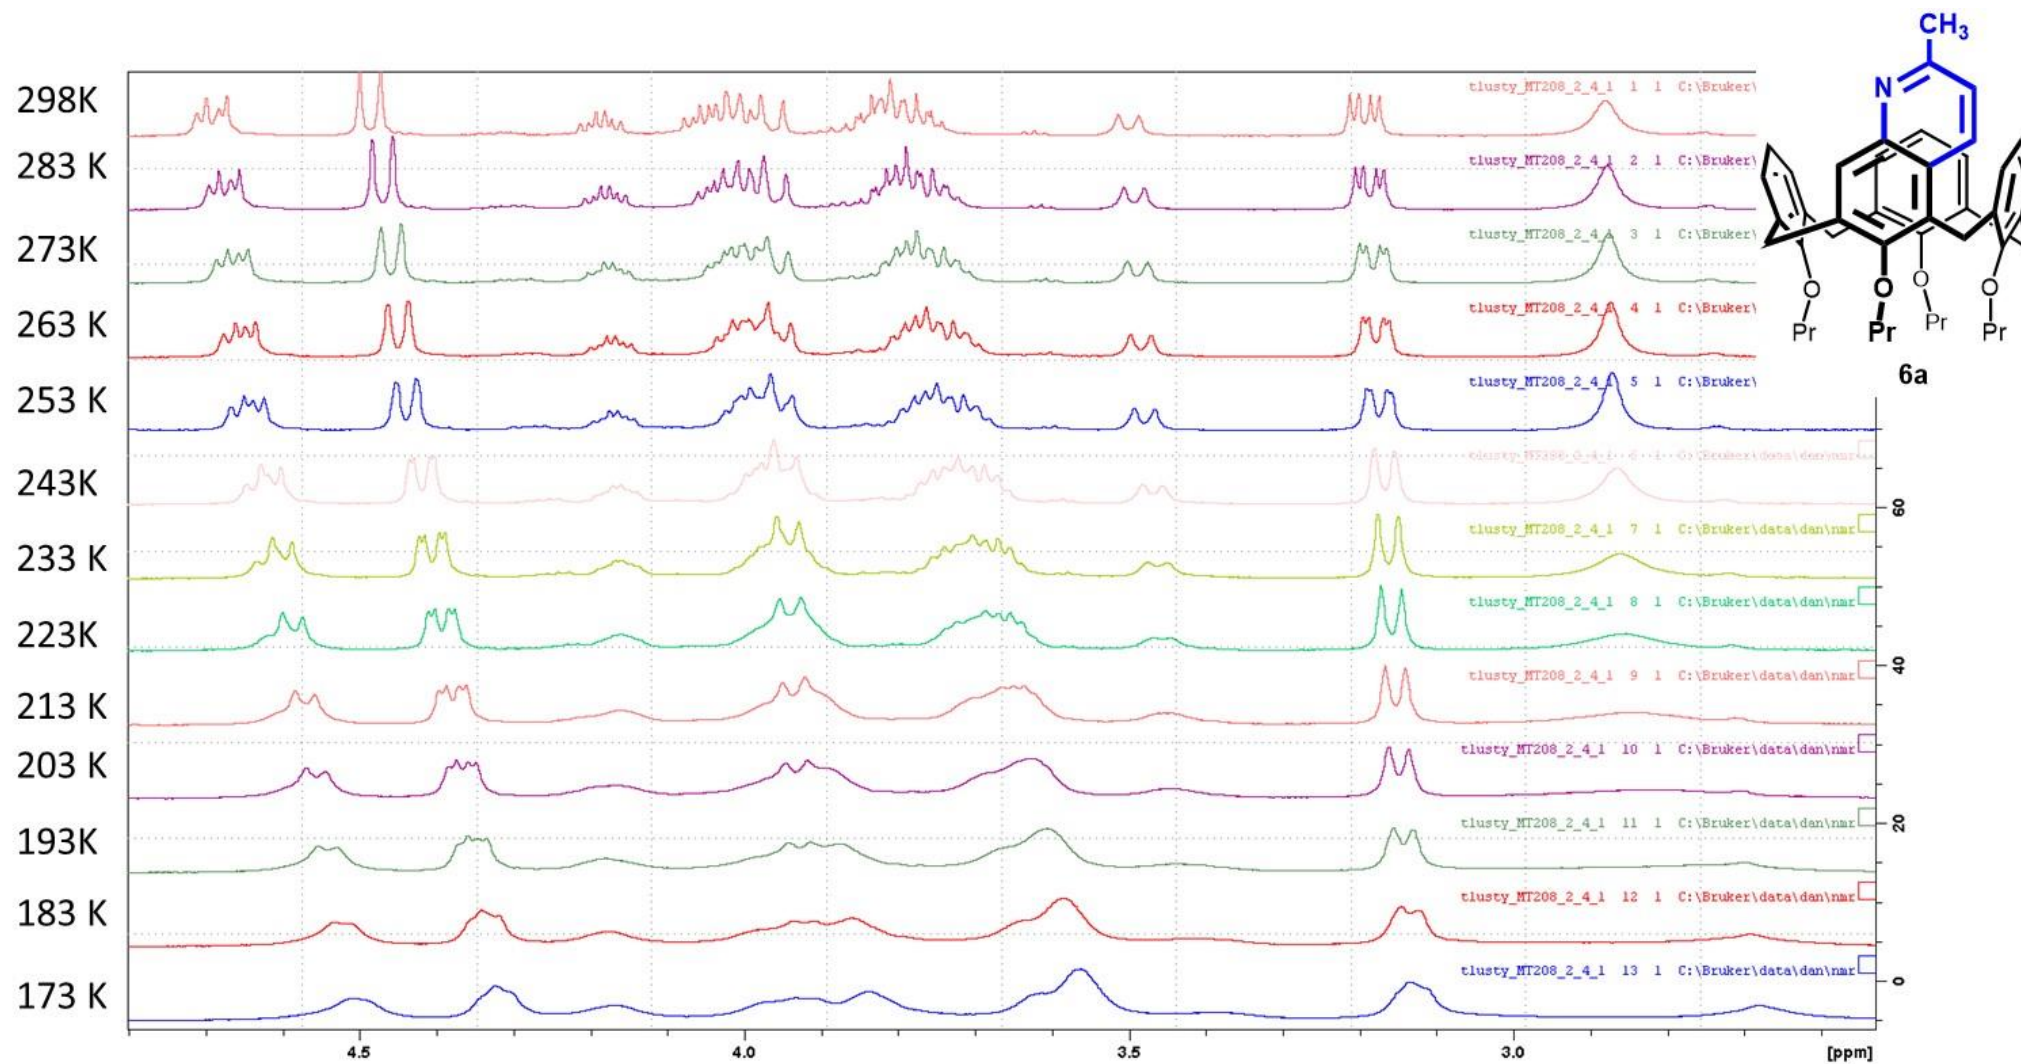

**Figure S50:** Variable temperature <sup>1</sup>H NMR spectra of compound **6a** (CD<sub>2</sub>Cl<sub>2</sub>, 500 MHz) – CH<sub>2</sub> signals region.
